1 **Computational exploration of dynamic mechanisms of steady state**  
2 **visual evoked potentials at the whole brain level**

3 Ge Zhang<sup>1,2</sup>, Yan Cui<sup>1,2</sup>, Yangsong Zhang<sup>3</sup>, Hefei Cao<sup>1,2</sup>, Guanyu Zhou<sup>1,2</sup>, Haifeng Shu<sup>4</sup>,  
4 Dezhong Yao<sup>1,2,5,\*</sup>, Yang Xia<sup>1,2</sup>, Ke Chen<sup>1,2</sup>, Daqing Guo<sup>1,2,\*</sup>

5 <sup>1</sup>The Clinical Hospital of Chengdu Brain Science Institute, MOE Key Lab for  
6 NeuroInformation, Center for Information in Medicine, School of Life Science and Technology,  
7 University of Electronic Science and Technology of China, Chengdu 611731, China

8 <sup>2</sup>Research Unit of NeuroInformation (2019RU035), Chinese Academy of Medical Sciences,  
9 Chengdu, China

10 <sup>3</sup>School of Computer Science and Technology, Southwest University of Science and  
11 Technology, Mianyang 621010, China

12 <sup>4</sup>Department of Neurosurgery, The General Hospital of Western Theater Command, Chengdu  
13 610083, China

14 <sup>5</sup>School of Electrical Engineering, Zhengzhou University, Zhengzhou 450001, China

15

16

17 \*Corresponding authors: [dyao@uestc.edu.cn](mailto:dyao@uestc.edu.cn) and [dqguo@uestc.edu.cn](mailto:dqguo@uestc.edu.cn)

18 **Abstract**

19       Periodic visual stimulation can induce stable steady-state visual evoked potentials (SSVEPs)  
20 distributed in multiple brain regions and has potential applications in both neural engineering  
21 and cognitive neuroscience. However, the underlying dynamic mechanisms of SSVEPs at the  
22 whole-brain level are still not completely understood. Here, we addressed this issue by  
23 simulating the rich dynamics of SSVEPs with a large-scale brain model designed with  
24 constraints of neuroimaging data acquired from the human brain. By eliciting activity of the  
25 occipital areas using an external periodic stimulus, our model was capable of replicating both  
26 the spatial distributions and response features of SSVEPs that were observed in experiments.  
27 In particular, we confirmed that alpha-band (8-12 Hz) stimulation could evoke stronger SSVEP  
28 responses; this frequency sensitivity was due to nonlinear entrainment and resonance, and could  
29 be modulated by endogenous factors in the brain. Interestingly, the stimulus-evoked brain  
30 networks also exhibited significant superiority in topological properties near this frequency-  
31 sensitivity range, and stronger SSVEP responses were demonstrated to be supported by more  
32 efficient functional connectivity at the neural activity level. These findings not only provide  
33 insights into the mechanistic understanding of SSVEPs at the whole-brain level but also  
34 indicate a bright future for large-scale brain modeling in characterizing the complicated  
35 dynamics and functions of the brain.

36

37 **Key words:** steady-state visual evoked potential (SSVEP), large-scale brain model, network  
38 properties, functional connectivity, structural connectivity

## 39 1. Introduction

40 When our brain is stimulated by a periodic visual flickering input, a nonlinear and stimulus-  
41 locked response appears in visual processing brain regions. This neuronal response is the so-  
42 called steady-state visual evoked potential (SSVEP), and appropriately periodic visual stimuli  
43 can induce strong SSVEP responses with high signal-to-noise ratios (Pastor et al., 2003; Vialatte  
44 et al., 2010). This feature allows SSVEPs to serve as a stable paradigm to build a brain-  
45 computer interface (BCI) and estimate the characteristics of task-related neural activity  
46 (Morgan et al., 1996; Vialatte et al., 2010; Yu Zhang et al., 2013, 2015). Although SSVEPs are  
47 believed to originate in the visual cortex located in the occipital lobe, experimental studies have  
48 revealed that this evoked neural activity can be widely observed in high-level visual processing  
49 brain regions, such as the frontal and parietal lobes (Di Russo et al., 2007; Pastor et al., 2003).  
50 These findings indicate that the emergence of SSVEPs should involve multiple regions broadly  
51 distributed in the brain and that SSVEP responses might thus be modulated by fundamental  
52 properties of brain networks. Additionally, SSVEPs have also been found to exhibit strong  
53 frequency sensitivity; moreover, in particular, they respond optimally to a suprathreshold  
54 stimulus at the alpha frequency band (8-12 Hz) (Norcia et al., 2015; Xu et al., 2013). However,  
55 despite accumulating experimental data, the biophysical mechanisms of both the frequency  
56 sensitivity of SSVEPs and the regulation of SSVEP responses in the brain remain largely  
57 unexplored.

58 Recent studies using computational modeling have provided deep insights into the  
59 mechanistic understanding of complicated brain dynamics and functions (Gosak et al., 2018;  
60 Parastesh et al., 2021). In this field, most of theoretical investigations on SSVEPs tried to  
61 reproduce nonlinear SSVEP dynamics at the neural circuit level (Labecki et al., 2016; Yang et al.,  
62 2019). Using a neural-field model of the cortex and thalamus, Roberts and Robinson showed  
63 the fundamental spectral properties of our brain when prompted by periodic visual stimuli  
64 (Roberts & Robinson, 2012). This physiologically based model not only explains the  
65 entrainment and harmonic behaviors of SSVEP responses but also predicts rich nonlinear  
66 dynamics in response to stimuli with high suprathreshold amplitudes. Further investigation  
67 revealed that several key features of SSVEP spectra can be captured by a simplified neural mass  
68 model consisting of excitatory and inhibitory neural populations. Using such an ideal model, it  
69 has been indicated that the harmonic and subharmonic components of SSVEPs are a natural  
70 consequence of the nonlinearities of neural populations (Labecki et al., 2016). Moreover, recent  
71 computational studies also suggested that the response of SSVEPs can be modulated by the  
72 interactions between different brain regions. By constructing a laminar cortical model that is  
73 composed of the primary visual cortex (V1) and the secondary visual cortex (V2), we have  
74 shown that SSVEP modulation is implemented by alpha oscillation in a complementary manner  
75 at different spatial levels (Yang et al., 2019). In particular, it is found that interlaminar coupling  
76 contributes to the laminar-specific organization of the evoked response following the opposite  
77 rules in the intracortical and intercortical drive (Yang et al., 2019), which unifies experimental  
78 observations that originally seemed contradictory (Koch et al., 2008; Morgan et al., 1996). To  
79 our knowledge, however, these modeling studies mainly focused on local neural circuits and

80 did not consider exploring large-scale brain dynamics of SSVEPs using computational models  
81 under realistic connectivity constraints.

82 Remarkably, the rapid development of large-scale brain modeling offers a powerful approach  
83 to reveal the neural mechanisms of specific cognitive functions or stimulus-induced activity at  
84 the whole-brain level (Breakspear, 2017; Gosak et al., 2018; Ponce-Alvarez et al., 2015; Shine  
85 et al., 2018). As pioneering work, a model of the large-scale macaque cortex was developed to  
86 explore spatiotemporal features of spontaneous cortical dynamics with anatomical constraints  
87 (Honey et al., 2007, 2009). During the resting state, this model exhibited several rich and  
88 interrelated spatiotemporal structures at multiple time scales, thus indicating that functional  
89 connectivity (FC) may be significantly shaped by brain structure. To further promote model  
90 performance, theoretical researchers have proposed constructing large-scale brain models by  
91 combining both the FC and structural connectivity (SC) acquired using magnetic resonance  
92 imaging (MRI) techniques (Gustavo Deco et al., 2019; Demirtaş et al., 2018). In particular,  
93 functional MRI (fMRI) data have been widely considered a condition of constrained  
94 optimization during model establishment. Such inverse-based models are capable of  
95 reproducing important features of large-scale brain dynamics, mainly because they link the  
96 structural and functional organization of the brain together (Cabral et al., 2017; G. Deco et al.,  
97 2014). Importantly, it has also been shown that the dynamic features of these large-scale brain  
98 models are governed by parameters with appropriate biophysical interpretation (Joglekar et al.,  
99 2018; Schirner et al., 2018). This fact allows several critical dynamical behaviors generated by  
100 large-scale models to be verified in well-designed experiments. Therefore, such large-scale  
101 brain modeling techniques have unique advantages that bridge system-level neural dynamics  
102 and specific cognitive functions or stimulus-induced activity in the brain.

103 In this study, we investigated the dynamic mechanisms of SSVEPs by constructing a large-  
104 scale brain model with human SC and FC data. To this end, the model was optimized with an  
105 iterative-fitting strategy proposed by Deco et al (G. Deco et al., 2014). By stimulating the model  
106 with periodic visual input in early-stage visual processing brain regions (i.e., the occipital lobe),  
107 we found that the stimulus-evoked potential could be propagated within our optimized model  
108 and SSVEP responses could also be detected in high-level visual processing areas, such as  
109 several regions in the frontal lobe. In particular, SSVEPs were optimal in response to a  
110 suprathreshold stimulus in the alpha band, and such frequency sensitivity of SSVEPs was  
111 thought to be a consequence of entrainment and resonance (Herrmann et al., 2016; Lab  
112 Notbohm et al., 2016). Additionally, the performance of SSVEP responses was also  
113 significantly related to the network properties, and a better SSVEP performance corresponded  
114 to a higher stimulus-evoked FC efficiency at the neural activity level. Our results thus provide  
115 a new perspective to understand the nonlinear responses of SSVEPs within the whole brain  
116 framework.

## 117 **2. Model and Methods**

### 118 **2.1 Empirical structural and functional connectivity**

119 A standard MRI dataset consisting of both empirical structural connectivity (SC) and

120 functional connectivity (FC) was employed to establish the large-scale brain model (G. Deco  
 121 et al., 2014; Hagmann et al., 2008). Briefly, the SC and FC data in this MRI dataset were derived  
 122 from five healthy right-handed male human participants (age  $29.4 \pm 3.4$  years) and were  
 123 acquired with a Philips Achieva 3T MRI system. For each subject, diffusion spectrum imaging  
 124 (DSI) was performed to track white matter tracts; then, the empirical SC matrix was constructed  
 125 with the anatomical landmarks of 66 gray matter cortical regions, which are listed in Table 1  
 126 (G. Deco et al., 2014; Hagmann et al., 2008). Theoretically, each SC element represents the  
 127 connectivity density between a pair of cortical regions. The average empirical SC matrix among  
 128 all subjects was the connectivity matrix used to couple different brain regions. However, we set  
 129 the connection of a region to itself to 0 in the connectivity matrix because the effect of internal  
 130 interactions was already considered in the microcircuit structure for each brain region (see  
 131 below).

132 We used the empirical FC matrix as the gold standard to optimize the large-scale brain model.  
 133 For each subject, blood oxygenation level-dependent (BOLD) signals (20 mins) were obtained  
 134 in the resting- state using the same 66 cortical regions described above (Buxton & Frank, 1997).  
 135 A global mean signal was regressed out from the BOLD signals before the FC was calculated.  
 136 Then, the resting-state FC matrix was constructed for each subject by measuring the Pearson's  
 137 correlation of BOLD signals among different brain regions. We averaged the resting-state FC  
 138 matrix across all subjects as the final empirical FC matrix in the present study ( for details; see  
 139 Honey et al., 2009).

## 140 2.2 Large-scale computational model of the brain

141 To explore the dynamic mechanisms of SSVEPs at the whole-brain level, we established a  
 142 large-scale model of the brain composed of 66 cortical regions. Regions in the model were  
 143 initially coupled by the empirical SC matrix. As schematically shown in Fig. 1A, the  
 144 microcircuit of each brain region was assumed to be a local network of excitatory and inhibitory  
 145 populations, and their dynamic behaviors were characterized by Wilson-Cowan equations. The  
 146 dynamics of our large-scale brain model are described as follows:

$$147 \begin{cases} \tau_E^j \frac{dr_E^j}{dt} = -r_E^j + \phi(J_{EE}r_E^j + J_{EI}r_I^j + I_g^j + I_b^j + I_{sti}^j) + \sqrt{\tau_E^j} \sigma_E^j \xi^j(t) \\ \tau_I^j \frac{dr_I^j}{dt} = -r_I^j + \phi(J_{IE}r_E^j + J_{II}r_I^j) + \sqrt{\tau_I^j} \sigma_I^j \xi^j(t) \end{cases} \quad (1)$$

148 where  $j$  indexes different brain regions,  $r_{E,I}^j$  represents the mean firing rate of the excitatory  
 149 (E) and inhibitory (I) populations of the  $j$ -th region,  $\tau_{E,I}^j$  denotes the corresponding time  
 150 constants, and  $\xi^j(t)$  is Gaussian white noise with zero mean and standard deviation  $\sigma_{E,I}^j$  for  
 151 excitatory and inhibitory neural populations in the  $j$ -th region. The transduction function  
 152  $\phi(x) = x/(1 - e^{-x})$  is employed to convert the current  $x$  to the firing rate. In our model, the  
 153 synaptic inputs within the microcircuit (i.e.,  $J_{EE}r_E^j$ ,  $J_{EI}r_I^j$ ,  $J_{IE}r_E^j$ , and  $J_{II}r_I^j$ ) are governed by  
 154 four synaptic coupling variables  $J_{EE}$ ,  $J_{EI}$ ,  $J_{IE}$ , and  $J_{II}$ . A background input  $I_b^j$  was fed to each  
 155 excitatory population to maintain spontaneous brain activity. Each excitatory population also

156 received the global synaptic input from other brain regions according to the function  $I_g^j =$   
157  $G \sum_i W_{ij} r_E^i$ , where the outer sum runs over interconnections onto the particular region  $j$ ,  $W_{ij}$   
158 is an element of the SC matrix representing the coupling between the regions  $i$  and  $j$ , an  $G$   
159 is a global coupling factor (also termed as global-scale coupling) that requires optimization. In  
160 addition, excitatory populations in several specific visual areas were driven by an external  
161 stimulus  $I_{sti}^j$  to induce a stimulus-evoked brain state.

162 Note that our model was first optimized with an iterative-fitting strategy (see below) in the  
163 resting state, and then the optimized large-scale brain model was used to investigate the  
164 dynamic mechanisms of SSVEPs in the stimulus-evoked state. When the brain received a  
165 uniform flash stimulus, SSVEPs could be recorded in a variety of visual areas (Rager & Singer,  
166 1998). To excite SSVEP responses in the model, we injected periodic visual input as an external  
167 stimulus into the occipital-related regions, including the lateral occipital cortex (LOCC),  
168 pericalcarine cortex (PCAL), lingual gyrus (LING) and cuneus (CUN). In simulations, this  
169 external periodic stimulus was modeled as the square wave described by:

$$170 \quad I_{sti}^j = \frac{A + A \cdot \text{sgn}[\sin(2\pi ft)]}{2} \quad (2)$$

171 Here,  $A$  and  $f$  represent the amplitude and frequency of the stimulus, and  $\text{sgn}(\cdot)$  is the sign  
172 function. Additionally, we have demonstrated the similar SSVEP responses can be also elicited  
173 by other types of external periodic stimuli, such as the flicking input with a sinusoidal wave  
174 profile (Supplementary Fig.1).

175 In simulations, stochastic differential equations were integrated by using the Euler-  
176 Maruyama method with a time step of 0.1 ms. Unless mentioned otherwise, the default values  
177 of the model parameters chosen are those presented in Table 2.

### 178 **2.3 Model optimization with an iterative-fitting strategy**

179 We employed an iterative-fitting strategy to optimize the large-scale brain model in the  
180 resting state (G. Deco et al., 2014). This optimal strategy is based on enhancing the original SC  
181 matrix by adding new links for pairs of nodes according to the corresponding FC between those  
182 nodes (G. Deco et al., 2014). Before the iterative-fitting process, we first constructed the large-  
183 scale brain model with the empirical SC matrix (Fig. 1B) and searched for an optimal global  
184 coupling factor  $G$  by maximizing the correlation between the empirical FC (Fig. 1B) and the  
185 simulated FC. To compute the simulated FC, we ran each simulation for 500 s to generate data  
186 for a sufficient period of time at the neural activity level and removed the first 20 s of data  
187 before analysis. Then, the Balloon-Windkessel hemodynamic model (Supplementary Text 1)  
188 was used to convert the neural activity of the excitatory population into the simulated BOLD  
189 signal (Buxton & Frank, 1997; Buxton et al., 1998; Friston et al., 2003). The simulated BOLD  
190 signal was downsampled to a low frequency (2 Hz) to have temporal resolution comparable  
191 with that of the empirically measured fMRI recordings. For each simulation, the simulated FC  
192 was obtained by computing the Pearson's correlation of the simulated BOLD signals among  
193 different brain regions. We averaged the simulated FC over 5 trials as the final simulated FC.

194 An initial optimization is performed for our model by varying the global coupling factor  $G$ ,  
195 and the optimal strength of  $G$  is identified by maximizing the correlation between the  
196 empirical FC and the simulated FC (Fig. 1B). After this initial optimization, an initial simulated  
197 FC could be determined at an optimal strength of the global-scale coupling  $G$  under constraints  
198 of empirical structural and functional connectivity (Fig. 1B).

199 With the iterative-fitting strategy, we tried to further improve the similarity between the  
200 empirical and simulated FC by adding a few links to the empirical SC. To do this, the maximal  
201 value of the empirical FC matrix was normalized to 1, and an initial tolerance level was set to  
202 1 to control the iterative process. We started the iterative-fitting algorithm with conditions under  
203 the normalized empirical FC as well as an initial simulated FC based on the empirical SC at the  
204 optimal strength of  $G$  (Fig. 1C). The iteration process can be mathematically described as  
205 follows: we defined the matrix of the simulated FC and normalized empirical FC as  $sFC$  and  
206  $eFC$ , respectively. At each iteration step, we needed to identify all connections in the simulated  
207 FC and normalized empirical FC satisfying the judgement condition of  $|eFC_{ij} - sFC_{ij}| > T$ .  
208 When  $eFC_{ij} > 0$ , the SC links for those identified connections were updated with the  
209 following rule:  $SC_{ij} = 0.15 \cdot eFC_{ij}$ . In the case of  $eFC_{ij} \leq 0$ , the corresponding SC links  
210 were redefined as  $SC_{ij} = 0$  when it was zero in the original matrix; otherwise,  $SC_{ij}$   
211 was scaled down to a minimum value of weights (0.0005) as described in the original matrix (G.  
212 Deco et al., 2014). Then, the large-scale brain model was reoptimized by maximizing the  
213 correlation between the empirical FC and the simulated FC with the newly generated SC versus  
214 the global coupling factor  $G$ . The above process was iterated several times by reducing the  
215 tolerance level ( $T = T - 0.025$ ) and was stopped when the tolerance level equals to 0.025. It  
216 is worth noting that the stopped tolerance level should be larger than 0 due to the condition of  
217  $|eFC_{ij} - sFC_{ij}| > T$ . Using this iterative-fitting strategy, the maximum fit between the optimal  
218 simulated SC and FC could be identified at an appropriate tolerance level (Fig. 1C). Under this  
219 condition, the correlation between the empirical and simulated FC achieved its maximal value,  
220 and the corresponding tolerance level is a judgement criterion for our model optimization.  
221 Compared with intrahemispheric connectivity, the anatomical structure of the brain derived  
222 from the DSI data would miss a relatively larger number of long-range interhemispheric  
223 connections. As reported previously (G. Deco et al., 2014), the iterative self-consistency  
224 enhancement of SC based on empirical fMRI data mainly increases the interhemispheric  
225 connections between homologous areas and can significantly promote the performance of the  
226 large-scale brain model.

## 227 **2.4 Data analysis**

228 We used several measurements to quantify SSVEP performance. Since SSVEPs are a fast  
229 stimulus-evoked response in the brain, high-temporal resolution data are required for capturing  
230 the rapid dynamics of SSVEPs. Therefore, in addition to model optimization, all other data  
231 generated by our model were analyzed at the neural activity level. For each experimental  
232 condition, we ran simulations of 20 trials with different random seeds. For each trial, the  
233 simulation was carried out for 500 s with stochastic initial conditions, and the first 20 s of data  
234 were removed before analysis. The rest of the data were resampled to 250 Hz, which is  
235 comparable to the sampling rate of real electroencephalography (EEG) recordings. These 480-

236 s-long data epochs were further divided into 48 segments, with each segment lasting for 10 s.  
237 In the following studies, we used all 48 data segments recorded to analyze SSVEP responses  
238 and randomly chose 5 data segments when measuring network properties and network  
239 synchronization. For each experimental condition, we calculated the segment-averaged results  
240 for each trial and then reported the data across 20 trials as the final results.

#### 241 **2.4.1 Analysis of SSVEP responses**

242 To measure the performance of SSVEP responses to the periodic driven stimulus, both the  
243 power and signal-to-noise ratios (SNRs) were estimated with the power spectral analysis for  
244 specific areas within the occipital and frontal lobes. These brain areas are highly associated  
245 with early and late stages of visual processing, and the SSVEPs have been widely observed in  
246 these regions. In this analysis, we computed the power spectrum density of neural activity in  
247 these visual-related regions by using the fast Fourier transform (FFT) method (Srinivasan et al.,  
248 2006). The SSVEP power  $S(f_0)$  was simply defined as the corresponding amplitude of the  
249 power spectral density at the stimulus frequency  $f_0$ . Then, the SNR value of the stimulus-  
250 evoked response was calculated as follows:

$$251 \quad \text{SNR} = 20 \cdot \log_{10} \left[ \frac{S(f_0)}{N(f_0)} \right], \quad (3)$$

252 where  $f_0$  is the stimulus frequency and  $N(f_0) = \frac{1}{14} \sum_{i=1}^7 [S(f_0 - 0.1 \times i) + S(f_0 + 0.1 \times i)]$   
253 represent the average power near the stimulus frequency  $f_0$  (1.4 Hz band centered on the  
254 stimulus frequency but excluding the stimulus frequency itself ; the frequency resolution is 0.1  
255 Hz). Additionally, to visualize the features of neural activity in both the time and frequency  
256 domains, time-frequency analysis was performed with the wavelet method for several areas  
257 located in the occipital and frontal lobes. The classical Morlet wave was used as the wavelet  
258 basis function, and the default bandwidth parameter and wavelet center frequency were fixed  
259 at 0.5 Hz and 1 Hz, respectively.

#### 260 **2.4.2 Analysis of network properties**

261 To quantify the SSVEP performance at the network level, we constructed the weighted brain  
262 networks under the resting state and stimulus-evoked state. For both types of brain states, we  
263 measured the FC among different regions at the neural activity level with coherence, which was  
264 defined as follows (Nunez et al., 1997):

$$265 \quad C(f) = \frac{|C_{xy}(f)|^2}{C_{xx}(f)C_{yy}(f)}. \quad (4)$$

266 Here  $C_{xy}(f)$  is the cross-spectrum between the neural activity of excitatory populations  $x(t)$   
267 and  $y(t)$  from different brain regions, and  $C_{xx}(f)$  and  $C_{yy}(f)$  are the corresponding  
268 autospectra at frequency  $f$ .

269 Several measurements were employed to assess network properties under different brain  
270 states. These network properties have been widely used in previous studies on brain network



271 analysis and include the clustering coefficient, characteristic path length, global efficiency, and  
272 local efficiency (Newman, 2003; Watts & Strogatz, 1998). In this study, we used the Brain  
273 Connectivity Toolbox ([www.brain-connectivity-toolbox.net](http://www.brain-connectivity-toolbox.net)) to calculate these network  
274 properties, with their detailed mathematical descriptions provided below.

275 To evaluate the degree of network collectivization, we calculated the clustering coefficient  
276 of the weighted brain network as follows:

$$277 \quad C = \frac{1}{N} \sum_{i \in N} \frac{\sum_{i, h \in N} (w_{i,j} w_{i,h} w_{j,h})^{1/3}}{k_i(k_i - 1)}, \quad (5)$$

278 where  $N$  is the number of nodes in the network,  $w_{i,j}$  indicates the weight between nodes  $i$   
279 and  $j$ , and  $k_i$  is the degree of node  $i$ .

280 The characteristic path length  $L$  is defined as the average of the shortest path length  $L_{ij}$   
281 between any two nodes in the network. Mathematically, this measurement can be computed as:

$$282 \quad L = \frac{1}{\frac{1}{N(N-1)} \sum_{i=1}^N \sum_{j \neq i}^N 1/L_{i,j}}. \quad (6)$$

283 Moreover, we estimated both the global and local efficiency of brain networks under the  
284 resting state and stimulus-evoked state. Global efficiency is defined as (Latora & Marchiori,  
285 2001):

$$286 \quad E_{\text{global}} = \frac{1}{N(N-1)} \sum_{i=1}^N \sum_{j \neq i}^N 1/L_{i,j}. \quad (7)$$

287 Theoretically, a smaller shortest path length (or a larger clustering coefficient) corresponds  
288 to a higher global efficiency with a relatively faster information transfer between nodes in the  
289 network. Compared with global efficiency, local efficiency reflects the extent of integration  
290 between the immediate neighbors of the given node (Achard & Bullmore, 2007). By definition,  
291 local efficiency could be obtained by averaging the local efficiencies of all nodes in a network  
292  $G$ .

$$293 \quad E_{\text{local}} = \frac{1}{N} \sum_{i \in G} E_{i\text{-local}}(G_i), \quad (8)$$

294 with

$$295 \quad E_{i\text{-local}} = \frac{1}{N_{G_i}} \sum_{i \in G_i}^{N_{G_i}} E_{\text{global}} G_i, \quad (9)$$

296 where  $G_i$  denotes the subgraph comprising all nodes that are immediate neighbors of node  $i$ ,  
297 and  $N_{G_i}$  is the number of nodes in  $G_i$ .

### 298 2.4.3 Measurement of network synchronization

299 The synchronization of neural activity among different brain regions is believed to play a  
300 crucial role in highly efficient neuronal information and cognitive processing (Della Rossa et  
301 al., 2020; Melloni et al., 2007; Parastesh et al., 2021). In this study, we also compared the  
302 synchronization of neural activity generated by our large-scale brain model under different  
303 brain states. Based on the mean-field theory, the synchronization factor  $R$  for the network can  
304 be mathematically calculated as:

$$305 \quad R = \frac{\langle F^2 \rangle - \langle F \rangle^2}{\frac{1}{N} \sum_{i=1}^N (\langle r_i^2 \rangle - \langle r_i \rangle^2)}, \quad (10)$$

306 where  $r_i$  is the mean firing rate of the excitatory population of the  $i$ -th region,  $N$  is the total  
307 number of brain regions,  $F = \sum_{i=1}^N r_i / N$  is the average neural activity across all brain regions,  
308 and the symbol  $\langle \cdot \rangle$  represents the mean of the variable over time. Theoretically, the  
309 synchronization factor  $R$  is within the range  $[0, 1]$ , and a larger  $R$  indicates a relatively  
310 higher level of synchronous neural activity among different brain regions.

## 311 3. Results

### 312 3.1 Optimization of the large-scale brain model

313 In this study, we investigated the dynamic mechanisms of SSVEPs using a large-scale brain  
314 model. As a preliminary step, we optimized the model with constraints of realistic human  
315 imaging data, and allowed it to generate simulated BOLD signals that can be comparable with  
316 real fMRI recordings. For this purpose, initial optimization was performed for the model by  
317 using the empirical SC and FC (Fig. 1B). At an optimal global-scale coupling of  $G = 3.41$ ,  
318 simulated FC derived from our large-scale brain model showed the best match with empirical  
319 FC (red square in Fig. 1B). Under this condition, the correlation between simulated and  
320 empirical FC achieved the maximal value of 0.41. To further improve the fit between simulated  
321 and empirical FC, we introduced an iterative-fitting strategy proposed in a previous study (G.  
322 Deco et al., 2014), which is systematically summarized in Fig. 1C. At the initial tolerance level  
323 of  $T = 1$ , we started this iterative-fitting strategy with the best fitted FC corresponding to the  
324 original empirical SC. During the iteration process, additional links were added into the SC  
325 matrix to reduce the tolerance level, and the new simulated SC was updated at each step. At a  
326 relatively low level of tolerance ( $T = 0.125$ ), the large-scale brain model exhibited the best  
327 performance at an optimal simulated SC (Fig. 2A). To achieve this optimal fit, we observed that  
328 the optimal global-scale coupling of  $G$  was fixed at 3.01. By comparing simulated SC with  
329 empirical SC, we identified approximately 10.28% and 21.25% newly added intrahemispheric  
330 and interhemispheric connections within the optimal simulated SC matrix (Figs. 2B and 2C).  
331 To our surprise, the correlation between the optimal simulated and empirical FC was improved  
332 to 0.82 (Figs. 2A and 2C). Our results further demonstrate the superiority of the iterative-fitting  
333 strategy, showing that the optimized model can best reproduce the large-scale brain dynamics  
334 by adding a certain number of new links to the SC derived from the DSI data.

### 335 **3.2 Typical SSVEP responses can be elicited in a large-scale brain model**

336 To examine whether the optimized large-scale brain model can capture the fundamental  
337 features of SSVEP responses, we excited the occipital lobe (LOCC, PCAL, LING, and CUN)  
338 with an external periodic stimulus and detected SSVEP responses in both these occipital regions  
339 and several frontal-related regions (frontal pole (FP), pars orbitalis (PORB), lateral  
340 orbitofrontal cortex (LOF), and medial orbitofrontal cortex (MOF)) (Fig. 3A and Table 1). From  
341 a functional perspective, the occipital lobe is involved primarily in the early stage of visual  
342 processing, whereas the abovementioned frontal regions are believed to participate in higher  
343 visual processing. In this work, the external periodic stimulus was generated by a square wave  
344 with default parameter values (amplitude 0.5 nA and frequency 10 Hz).

345 In Figs. 3B and 3C, we show typical examples of neural activity and the corresponding time-  
346 frequency spectrogram for different occipital and frontal regions, respectively. For each time-  
347 frequency spectrogram, a remarkable power increase could be observed near the driving  
348 frequency of the external periodic stimulus. This indicated that SSVEPs could be elicited in  
349 both the occipital and frontal regions, two main sources of SSVEPs observed in experimental  
350 studies. Consistent with experimental studies, brain regions distributed in the occipital lobe  
351 showed much stronger SSVEP responses than frontal-related regions (Ding et al., 2006; Morgan  
352 et al., 1996; Srinivasan et al., 2007). This is not surprising because SSVEPs are believed to be  
353 originally elicited in the occipital area, and its propagation through nerve fibers may lead to a  
354 notable reduction in evoked power. Further power spectrum analysis with FFT not only  
355 revealed an obvious power peak located at 10 Hz for each region but also demonstrated distinct  
356 SSVEP performance in the occipital-related regions (Figs. 3D and 3E). Compared with other  
357 occipital regions, the LOCC was a mid-level visual processing area and displayed relatively  
358 lower SSVEP power (Fig. 3D). In addition, more complicated features of the SSVEP spectra,  
359 including odd harmonic components, could also be observed in these occipital regions (Fig.  
360 3D). Theoretically, this might be because the square wave input contains only odd harmonics.  
361 However, due to signal attenuation during the propagation process, such complicated spectral  
362 features of SSVEP responses disappeared in the frontal lobe (Fig. 3E). Overall, the above results  
363 confirmed that the large-scale brain model can reproduce the fundamental dynamic features of  
364 SSVEP responses.

### 365 **3.3 Impacts of an external periodic stimulus on SSVEP responses**

366 Previous experimental studies have documented that the performance of SSVEP responses  
367 could be greatly impacted by the physical properties of periodic visual stimuli (Ding et al., 2006;  
368 Morgan et al., 1996). As important nonlinear SSVEP dynamics, it has been specifically reported  
369 that responses of SSVEPs in the occipital and frontal cortex are strongly sensitive to the  
370 frequency of visual stimuli (Di Russo et al., 2007; Labecki et al., 2016; Srinivasan et al., 2006).  
371 Using our large-scale brain model, we studied the dependence of SSVEP performance on the  
372 stimulus frequency of the external periodic visual input. In Figs. 4A and 4B, we depicted both  
373 the power and SNR of SSVEPs as a function of the stimulus frequency for different occipital  
374 regions. With increasing stimulus frequency, we found that both the SSVEP power and the SNR

375 value first rose and then dropped. For each brain region, their maximal values were achieved at  
376 an intermediate stimulus frequency. In agreement with experimental observations (Ding et al.,  
377 2006; Xu et al., 2013), our large-scale brain model correctly predicted that these occipital  
378 regions would show optimal responses to external periodic stimuli in the alpha frequency band  
379 (8-12 Hz). This nonlinear SSVEP behavior is the so-called frequency sensitivity, and similar  
380 findings were also observed in the frontal regions (Figs. 4C and 4D). However, in comparison  
381 with the occipital lobe, both SSVEP power and SNR values observed in these frontal regions  
382 showed significantly lower magnitudes at different stimulus frequencies (Mann–Whitney U test,  
383  $p < 0.001$ ). In addition, the frequency-sensitivity range was slightly reduced during the  
384 propagation of evoked neural activity. Such a reduction resulted in a relatively narrow  
385 frequency-sensitivity range for regions distributed in the frontal lobe (Fig. 4D).

386 In reality, the performance of the SSVEP responses can also be influenced by the amplitude  
387 of the external periodic stimulus. As shown in Fig. 5, positive relationships were observed  
388 between SSVEP responses (i.e., SSVEP power and the SNR value) and stimulus amplitude in  
389 both the occipital and frontal regions. When the external stimulus was weak, the model  
390 generated spontaneous neural activity that was comparable to real electrophysiological  
391 recordings. Under this condition, only weak SSVEP responses were detected in the occipital  
392 regions (Figs. 5A and 5B). For a large stimulus amplitude, the dynamics of these occipital  
393 regions responded well to the external periodic stimulus, thus inducing relatively stronger  
394 SSVEP responses (Figs. 5A and 5B). Due to strong interactions among brain regions, evoked  
395 neural activity in these occipital regions could be transmitted to the frontal lobe through nerve  
396 fibers in a reasonably strong manner. Consequently, large values of both SSVEP power and  
397 SNRs were observed in the frontal regions (Figs. 5C and 5D).

### 398 **3.4 Dynamical nature of the frequency sensitivity of SSVEPs**

399 Exploring the dynamic nature of frequency-sensitivity behavior can deepen our mechanistic  
400 understanding of SSVEPs. Intuitively, we hypothesized that the frequency sensitivity of  
401 SSVEPs may be caused by both the entrainment and resonance due to the cooperation of  
402 intrinsic brain oscillations and external periodic stimuli. In physics, entrainment reflects that  
403 the natural oscillation of an internal oscillator perturbed by an external periodic stimulus  
404 becomes synchronized to the periodic driven force, whereas resonance describes the  
405 phenomenon of increased amplitude that occurs when the frequency of a periodically applied  
406 stimulus is equal or close to an intrinsic frequency of the system on which it acts. To examine  
407 whether our hypothesis is true, we simulated large-scale brain dynamics in the resting state and  
408 stimulus-evoked state. In Fig. 6A, we compared the average power spectral density of the whole  
409 brain between the resting state (black dotted line) and stimulus-evoked state (colored lines). At  
410 the resting state, the brain dynamics generated by the model showed relatively strong powers  
411 in the alpha band, which matched well with the frequency-sensitivity range (8-12 Hz) of  
412 SSVEPs. When the model is driven by an external periodic stimulus, the peak frequency of  
413 neural oscillations is shifted to the stimulus frequency (colored lines). Further analysis showed  
414 that the collective neural activity among different brain regions exhibited relatively strong  
415 synchronization when the stimulus frequency was in the alpha band (Fig. 6B). This evidence

416 indicates the occurrence of neuronal entrainment and such entrained oscillation tends to be  
417 weakened provided that the stimulus frequency and intrinsic oscillation frequency are  
418 mismatched. Moreover, we also observed the increased amplitude of neural oscillations in the  
419 occipital lobe when the stimulus frequency of the external periodic input is close to the intrinsic  
420 oscillation frequency of the resting-state brain dynamics (Supplementary Fig. 2). This implies  
421 that resonance may also contribute to the origin of SSVEPs and, under such condition, the  
422 strongest SSVEP power can be detected at the whole-brain level (yellow line in Fig. 6A). To a  
423 certain extent, such resonance-induced enhancement in SSVEP response might also impact the  
424 frequency sensitivity of SSVEPs. Overall, these findings supported our hypothesis that the  
425 frequency sensitivity of SSVEPs might be determined by the combined effects of neuronal  
426 entrainment and resonance.

427 A naturally arising question is whether the frequency-sensitivity range of SSVEPs can be  
428 modulated by endogenous factors in the brain. We argue that this is possible because such a  
429 frequency-sensitivity range should be changed with the intrinsic oscillation frequency of the  
430 brain. To test this notion, we illustratively varied the intrinsic oscillation frequency of the large-  
431 scale brain model by tuning the default time constant of excitatory neural populations  $\tau_E$  (Figs.  
432 6C and 6D). This parameter determines how quickly the firing rate of an excitatory neural  
433 population decays to the baseline level of spontaneous brain activity. Theoretically, the increase  
434 in the time constant of excitatory neural populations slowed down the model dynamics and thus  
435 resulted in a low intrinsic oscillation frequency. For both occipital and frontal lobes, such a  
436 decreasing effect on intrinsic oscillation frequency shifted the frequency-sensitivity range of  
437 SSVEPs toward the left, corresponding to a stimulus within a low-frequency regime (Figs. 6C  
438 and 6D). By reducing the time constant of excitatory neural populations, the opposite results  
439 were obtained because of the emergence of a high intrinsic oscillation frequency (Figs. 6C and  
440 6D). Indeed, a similar frequency-sensitivity modulation of SSVEPs could also be observed by  
441 tuning the time constant of inhibitory neural populations (data not shown) or other endogenous  
442 factors that impact the intrinsic oscillation frequency. These results provide evidence that the  
443 frequency-sensitivity range of SSVEPs may change together with the intrinsic oscillation  
444 frequency of the brain.

### 445 **3.5 Network properties contribute to the performance of SSVEP responses**

446 Given that SSVEPs are regulated by multiple brain areas, we performed graph analysis for  
447 brain networks under both resting and stimulus-evoked states. Figs. 7A and 7B show the  
448 clustering coefficient and characteristic path length of the evoked brain networks, respectively,  
449 at each stimulus frequency (red lines). For comparison, we also plotted these two network  
450 measurements for the resting-state brain networks in Figs. 7A and 7B (blue lines). A bell-shaped  
451 curve was observed for the clustering coefficient (Fig. 7A), whereas the characteristic path  
452 length exhibited an inverted bell-shaped curve (Fig. 7B). Slightly different from SSVEP  
453 responses, the large clustering coefficients and small characteristic path lengths mainly  
454 appeared in the low alpha band (8-10 Hz). At all frequency points, we found that the stimulus-  
455 evoked brain networks displayed stronger clustering coefficients and smaller characteristic path  
456 lengths than those of the resting-state brain networks. According to complex network theory,

457 this implied that the evoked brain state may be endowed with a higher small-worldness, thus  
458 exhibiting a more efficient FC with high parallel information transfer at the neural activity level.  
459 Further examination showed that both global and local efficiency exhibited bell-shaped curves;  
460 brain networks evoked by stimuli also presented higher global and local efficiency than the  
461 global and local efficiency observed in the resting state (Figs. 7C and 7D). For both types of  
462 brain networks, global and local efficiency also achieved their optimal performance when the  
463 stimulus frequency was near 9.5 Hz (Figs. 7C and 7D), further supporting that the frequency  
464 sensitivity of SSVEPs is determined by the intrinsic oscillation frequency of the brain at the  
465 network level.

466 To gain a better mechanistic understanding of SSVEPs, we also assessed the differences in  
467 FC between the stimulus-evoked state and the resting state at the neural activity level by a two-  
468 sample Student's t-test with a significance level of  $p < 0.05$  (familywise error (FWE)  
469 correction). Compared with resting-state brain networks, no significant decreases in  
470 connections were found in networks in the stimulus-evoked state (Fig. 8A). For both low and  
471 high stimulus frequencies, enhanced connections in the stimulus-evoked state mostly appeared  
472 between the occipital and temporal lobes (see 6 Hz and 14 Hz; Fig. 8A). Under this condition,  
473 the evoked neural activity could not be well transmitted to other brain lobes, thus causing weak  
474 SSVEP responses in the frontal lobe (Figs. 4C and 4D). For an appropriate stimulus frequency  
475 of 9.5 Hz, we identified a broad enhancement in connectivity within the whole brain (Fig. 8A).  
476 This resulted in highly efficient FC at the neural activity level corresponding to better SSVEP  
477 performance. There might be two possible contributors to this observation: increased neural  
478 activity and enhanced network synchronization. By comparing activation between these two  
479 brain states, we found that the average firing rates of most brain regions were not changed  
480 dramatically in the stimulus-evoked brain state (Fig. 8B). Significantly increased neural activity  
481 was only observed for occipital regions because of the direct provocation by the external  
482 periodic stimulus (Fig. 8B). Our observation thus provided evidence to rule out the first  
483 contributor. Accordingly, such high-efficiency FC was supposed to be a result of the enhanced  
484 synchronous neural activity among brain regions (Fig. 6B and Figs. 7A-7D).

485 Indeed, our real brain cannot always work under its optimized condition corresponding to  
486 optimal global-scale coupling (i.e.,  $G = 3.01$  for the tolerance level of  $T = 0.125$ ), but it is  
487 highly possible to operate near this optimal point due to several factors, such as neural plasticity  
488 and individual variability. Obviously, different global-scale couplings will lead to distinct  
489 SSVEP responses and network properties. To explore the relationships between SSVEP  
490 responses and network properties, we changed the value of  $G$  around this optimal point in our  
491 large-scale brain model, and calculated the average SSVEP responses across all regions and  
492 different network properties for each fixed  $G$ . In Figs. 9A-9D, we summarized the dependence  
493 of network properties on the average SSVEP responses. The clustering coefficient, global  
494 efficiency, and local efficiency showed significant positive correlations with both SSVEP  
495 power and SNR values (Figs. 9A, 9C, and 9D; two-tailed Student's t-test,  $p < 0.01$ ). In  
496 contrast, SSVEP responses were negatively correlated with the characteristic path length of  
497 brain networks (Fig. 9B). These data indicated that stronger SSVEP responses of the brain must

498 be supported by more efficient FC that is composed of locally and nonlocally distributed brain  
499 regions.

#### 500 **4. Discussion**

501 SSVEPs have been widely used in both neural engineering and cognitive neuroscience, but  
502 their underlying dynamic mechanisms within the brain remain to be elucidated. By using a  
503 large-scale brain model that integrated multimodal imaging data, we provided computational  
504 insights into the mechanistic understanding of SSVEPs at the whole-brain level. Through  
505 simulations, we showed that our model can capture the fundamental features of SSVEPs. Under  
506 suitable conditions, notable SSVEP responses were detected in both the occipital and frontal  
507 lobes, and the performance of SSVEPs was largely impacted by the physical properties of  
508 periodic visual stimuli. In particular, we observed that SSVEPs responded optimally to an  
509 external periodic stimulus at a specific frequency-sensitivity range of 8-12 Hz (alpha band).  
510 Further detailed graph analysis not only revealed that the stimulus-evoked brain network  
511 displayed relatively high levels of efficiency and synchronization in a similar frequency-  
512 sensitivity range but also confirmed that efficient FC at the neural activity level supports  
513 stronger SSVEP responses. Together, these findings contribute to a better understanding of  
514 nonlinear SSVEP dynamics in the brain.

515 The dynamic response of our brain to external periodic input is fundamental for neural  
516 information processing (Burkitt et al., 2000; Vialatte et al., 2010). Here, our modeling results  
517 indicated that the response of SSVEPs showed the best performance for flickering visual  
518 stimulation within 8-12 Hz. Notably, this is in good agreement with previous experimental  
519 studies, showing that the largest SSVEP response is elicited by low-frequency visual  
520 stimulation in the alpha band (Herrmann et al., 2016; Keitel et al., 2014; Spaak et al., 2014).  
521 Our theoretical analysis further revealed that the dynamic nature of the frequency sensitivity of  
522 SSVEPs can be attributed to combined effects of nonlinear entrainment and resonance, and the  
523 strongest SSVEP response occurs when the stimulus frequency is near the intrinsic oscillation  
524 frequency of the brain. As a prominent rhythm of the brain in a resting state, neural oscillations  
525 at the alpha band (~10 Hz) are known to be involved in many types of perceptual or cognitive  
526 functions (Herrmann et al., 2016; Pfurtscheller, 2003; Spaak et al., 2014). In particular, alpha-  
527 band neural oscillations have been widely detected in EEG recordings across a variety of brain  
528 regions, especially during wakeful relaxation with closed eyes (Birca et al., 2006). This suggests  
529 that the alpha-dominated rhythm may be the intrinsic neural oscillations of our brain, thus  
530 offering a physiological basis in support of the frequency-sensitivity phenomenon observed in  
531 SSVEPs.

532 However, it should be noted that, although several previous modeling studies have also  
533 implicated that both entrainment and resonance might serve as a possible mechanism in shaping  
534 the frequency response of SSVEPs, most of these studies only used simplified models to  
535 simulate the dynamics of local neural populations (Herrmann et al., 2016; Labecki et al., 2016;  
536 Notbohm et al., 2016; Roberts & Robinson, 2012). By building a large-scale brain model under  
537 constraints of realistic human data, we provided here the first computational evidence that such

538 frequency sensitivity induced by entrainment and resonance can also appear at the whole-brain  
539 level.

540 Our model further predicts that the frequency-sensitivity range of SSVEPs can be regulated  
541 by changing the intrinsic oscillation frequency of the brain. At the microscopic scale, a real  
542 brain may provide some endogenous mechanisms to automatically adjust intrinsic neural  
543 oscillations (Buzsáki & Draguhn, 2004; Herrmann et al., 2016; Latorre et al., 2019); two of  
544 these mechanisms are discussed as follows. First, one possibility with high plausibility is  
545 directly modulating the intrinsic response properties of neurons. For instance, the decrease in  
546 the time constant of cortical neurons in response to decreasing membrane resistance and  
547 capacitance tends to result in fast intrinsic neural oscillations (Brunel & Wang, 2003). Under  
548 this condition, the frequency-sensitivity range should be shifted toward the high-frequency  
549 regime. On the other hand, the concentrations of several types of neurotransmitters have also  
550 been found to take part in the regulation of neural oscillations (Basar & Güntekin, 2008;  
551 Mariotti et al., 2016). For example, it has been observed that the concentration of gamma-  
552 aminobutyric acid (GABA) in the resting state is positively correlated with the frequency of  
553 oscillations in response to visual stimulation in humans (Muthukumaraswamy et al., 2009).  
554 Therefore, changing the concentrations of several specific neurotransmitters may also provide  
555 an alternative approach to modulate the frequency-sensitivity range of SSVEPs. It is worth  
556 noting that a similar frequency-sensitivity phenomenon has been extensively reported in neural  
557 systems and is believed to play functional roles in highly efficient information processing in  
558 the brain (Başar & Güntekin, 2008; Guo et al., 2018). The modulating approaches proposed  
559 here may also contribute to a better understanding of these frequency-sensitivity behaviors  
560 observed in neural systems.

561 Highly reliable signal conduction in the brain requires efficient FC. Past experimental studies  
562 have revealed that SSVEPs involve both local brain regions and distant, widely distributed brain  
563 regions (Birca et al., 2006; Labecki et al., 2016; Zhang et al., 2013). To a certain extent, this  
564 might lead to the propagation of SSVEPs in the brain being highly impacted by fundamental  
565 properties of cortical networks (Zhang et al., 2013). In the present study, we showed that the  
566 performance of SSVEP responses was related to the efficiency of the functional network in the  
567 stimulus-evoked state. By comparing network properties at different stimulus frequencies, we  
568 identified that the evoked brain state exhibited a relatively highly efficient FC at the neural  
569 activity level when the stimulus frequency was in the low alpha band. In this specific stimulus  
570 frequency region, we found that more enhanced connections existed between the occipital-  
571 temporal and frontal regions compared with the connections noted in other stimulus frequencies,  
572 thus ensuring good propagation of SSVEPs in the brain. In addition, our analysis suggested that  
573 the emergence of such highly efficient FC was mainly influenced by the enhanced synchronous  
574 neural activity among brain regions but not by a significant enhancement in neural activation  
575 driven by external periodic stimuli. Using limited specific stimulus frequencies, many  
576 experimental studies have also observed that stronger SSVEP responses correspond to more  
577 efficient functional networks (Thut et al., 2012; Xu et al., 2013). With the assistance of large-  
578 scale brain modeling, we further extended this observation to continuous frequency space. We



579 highlight these findings because they established the linkage between the frequency sensitivity  
580 of SSVEPs and the high-level performance of stimulus-evoked brain networks in the low alpha  
581 band.

582 There is a broad consensus that individual differences inevitably exist in many SSVEP  
583 studies. In particular, it has been experimentally observed that the responses of SSVEPs display  
584 substantial variability across subjects (Koch et al., 2008; Labecki et al., 2016; Zhang et al.,  
585 2013). In addition, different subjects may show distinct SSVEP peak frequencies. Notably, our  
586 modeling results might provide explainable insights into individual differences observed in  
587 experimental studies. On the one hand, the development of the human brain is highly  
588 susceptible to changes in a complicated environment (Corbetta et al., 2008; Kramer et al., 2004).  
589 During the development of the brain, this factor influences a dynamic change of structure-  
590 function relationships for different subjects, thus leading to distinct network efficiency in their  
591 FC. As discussed above, the differences in FC efficiency will thus result in substantial  
592 variability in SSVEP responses across subjects. On the other hand, alpha-band neural  
593 oscillations are believed to contribute the most prominent intrinsic oscillation frequency to the  
594 brain (Keitel et al., 2014; Pfurtscheller, 2003; Spaak et al., 2014). In the literature, it has been  
595 reported that neural oscillations in the alpha band are highly associated with thalamocortical  
596 interactions and that the alpha peak frequency may change with age (Birca et al., 2006; Cantero  
597 et al., 2009). Intriguingly, accumulating data have revealed that different subjects may exhibit  
598 a certain level of individual variability in alpha peak frequency (Haegens et al., 2014). If our  
599 above findings on the frequency sensitivity of SSVEPs can reflect real behavior, such alpha  
600 peak variability may provide a physiological basis for the experimentally observed individual  
601 differences in SSVEP peak frequency.

602 In the present study, we only focused on the dynamic mechanisms of SSVEPs and did not  
603 involve any cognitive process. Therefore, our model is assumed to be simply driven by the  
604 same external stimulus in bilateral occipital lobes. However, a large number of studies have  
605 provided evidence that several cognitive processes, such as attention, may take part in the  
606 modulation of SSVEP response (Gulbinaite et al., 2019; Hillyard et al., 1997; Keitel et al., 2014;  
607 Keitel et al., 2017; Keitel et al., 2019; Müller et al., 1998; Müller & Hillyard, 2000). In particular,  
608 both the negative and positive attentional modulation of alpha-band SSVEPs have been widely  
609 observed even in the similar experiments (Keitel et al., 2014; Keitel et al., 2017), and such  
610 seemingly contradictory findings can be reconciled with different analyzing approaches (Keitel  
611 et al., 2019). Several previous studies also indicated that effects of attention on SSVEPs can be  
612 observed up to the gamma band, and the sign of attentional modulation of SSVEP amplitude  
613 might be frequency dependent (Gulbinaite et al., 2019; Herrmann, 2001). By introducing well-  
614 designed stimulus paradigms, our large-scale brain model could be also used to investigate the  
615 dynamic mechanisms of attentional modulation of SSVEPs and unify distinct experimental  
616 observations in different parameter regimes, another topic that deserves to be explored in the  
617 future studies.

618 Although our large-scale model of the brain is a powerful tool for reproducing the  
619 fundamental characteristics of SSVEPs at the system level, we must admit that this model is

620 idealized and can be extended in several aspects. First, we simulated the dynamics for each  
621 brain region by using a simplified microcircuit structure composed of a group of excitatory and  
622 inhibitory populations. However, the cerebral cortex of the mammalian brain is organized into  
623 layers of specialized neuronal subtypes (Burt et al., 2018; Greig et al., 2013; Miller et al., 2019).  
624 Previous modeling studies have shown that such laminar specification may perform important  
625 functions in signal propagation and modulation between brain regions (D'Souza & Burkhalter,  
626 2017). Therefore, it is reasonable to further construct a more physiological large-scale brain  
627 model with a detailed laminar structure and explore how the cortical laminar structure impacts  
628 the propagation of this evoked neural activity in the brain. Second, we did not incorporate the  
629 transmission delay in our model. Indeed, the transmission delay between two brain regions is  
630 highly dependent upon their distance, which may range from several milliseconds to hundreds  
631 of milliseconds (Kringelbach et al., 2020; Ziaemehr et al., 2020). In theory, introducing the  
632 distant-dependent time delay into a large-scale brain model will significantly enrich the model  
633 dynamics and influence SSVEP responses, a prediction that deserves to be examined in future  
634 studies. Finally, we ignored the hierarchical organization of the human brain in the model. By  
635 developing a large-scale dynamic model of the macaque neocortex with embedded hierarchy,  
636 previous studies have successfully reproduced the functional hierarchy among visual cortical  
637 areas that could be compared with experimental observations (Mejias et al., 2016). It has also  
638 been proposed that the hierarchical structure may play functional roles in the balance between  
639 integration and segregation by mediating neural gain (Shine et al., 2018). In future studies, it  
640 will be necessary to further explore whether nonlinear SSVEP dynamics can also be modulated  
641 by the hierarchical organization of the brain.

642 To summarize, we performed a systematic study on the dynamic mechanisms of SSVEPs  
643 with a large-scale brain model constrained by empirical human MRI data. We demonstrated  
644 that such a biophysical-based model could capture the fundamental features of SSVEP  
645 dynamics and reproduce the distributed characteristics of SSVEPs in the brain. Our results  
646 indicated that the dynamic nature of SSVEPs is a consequence of neuronal entrainment and  
647 resonance, and revealed that the efficient stimulus-evoked FC that emerges in a frequency-  
648 sensitivity range near the alpha band contributes to the high-level performance of SSVEP  
649 responses. These findings might not only deepen our current understanding of the biophysical  
650 mechanisms of SSVEPs but may also inspire testable hypotheses for future experiments.  
651 Additionally, our study emphasizes that large-scale brain modeling is a promising approach  
652 with a bright future to characterize the dynamics and functions of the brain in continuous  
653 parameter spaces under both normal and abnormal states. Further establishing the large-scale  
654 brain model at the individual level will form the personalized digital twin brain (DTB), which  
655 will greatly promote the applications of virtual brain technology in the studies of individualized  
656 medicine.

## 657 **Data and Code Availability:**

658 All MRI data used in this study can be downloaded from the Github repository of TVB-data  
659 ([https://github.com/the-virtual-brain/tvb-data/tree/master/tvb\\_data/connectivity](https://github.com/the-virtual-brain/tvb-data/tree/master/tvb_data/connectivity)). Codes of the

660 large-scale brain model were developed by Daqing Guo's Group at the University of Electronic  
661 Science and Technology of China, and will be also available by request after the acceptance of  
662 this manuscript.

### 663 **CRedit authorship contribution statement**

664 Ge Zhang: Methodology, Formal analysis, Visualization, Writing-Original draft preparation.  
665 Yan Cui: Formal analysis, Visualization. Yangsong Zhang: Formal analysis, Funding  
666 acquisition. Hefei Cao: Methodology Guanyu Zhou: Methodology. Haifeng Shu: Data curation,  
667 Methodology. Dezhong Yao: Investigation, Conceptualization, Funding acquisition, Writing-  
668 Reviewing & Editing. Yang Xia: Funding acquisition. Ke Chen: Conceptualization, Resources.  
669 Daqing Guo: Conceptualization, Supervision, Funding acquisition, Writing-Reviewing &  
670 Editing.

### 671 **Declaration of competing interest:**

672 The authors declare no competing financial interests.

### 673 **Acknowledgments**

674 We sincerely thank Prof. Peng Xu and Prof. Mingming Chen for the valuable discussions.  
675 This work is supported by the National Natural Science Foundation of China (Nos. 31771149,  
676 81861128001, 82072011, 61871423), the Sichuan Science and Technology Program (No.  
677 2018HH0003), and the CAMS Innovation Fund for Medical Sciences (CIFMS) (No. 2019-  
678 I2M-5-039).

## 679 **References**

- 680 Achard, S., & Bullmore, E. (2007). Efficiency and Cost of Economical Brain Functional Networks.  
681 *PLoS Computational Biology*, 3(2), e17. <https://doi.org/10.1371/journal.pcbi.0030017>
- 682 Başar, E., & Güntekin, B. (2008). A review of brain oscillations in cognitive disorders and the role of  
683 neurotransmitters. *Brain Research*, 1235, 172–193.  
684 <https://doi.org/10.1016/j.brainres.2008.06.103>
- 685 Birca, A., Carmant, L., Lortie, A., & Lassonde, M. (2006). Interaction between the flash evoked  
686 SSVEPs and the spontaneous EEG activity in children and adults. *Clinical Neurophysiology*,  
687 117(2), 279–288. <https://doi.org/10.1016/j.clinph.2005.10.001>
- 688 Breakspear, M. (2017). Dynamic models of large-scale brain activity. *Nature Neuroscience*, 20(3),  
689 340–352. <https://doi.org/10.1038/nn.4497>
- 690 Brunel, N., & Wang, X.-J. (2003). What determines the frequency of fast network oscillations with  
691 irregular neural discharges? I. Synaptic dynamics and excitation-inhibition balance. *Journal*  
692 *of Neurophysiology*, 90(1), 415–430. <https://doi.org/10.1152/jn.01095.2002>
- 693 Burkitt, G. R., Silberstein, R. B., Cadusch, P. J., & Wood, A. W. (2000). Steady-state visual evoked  
694 potentials and travelling waves. *Clinical Neurophysiology*, 111(2), 246–258.  
695 [https://doi.org/10.1016/S1388-2457\(99\)00194-7](https://doi.org/10.1016/S1388-2457(99)00194-7)
- 696 Burt, J. B., Demirtaş, M., Eckner, W. J., Navejar, N. M., Ji, J. L., Martin, W. J., Bernacchia, A., Anticevic,  
697 A., & Murray, J. D. (2018). Hierarchy of transcriptomic specialization across human cortex  
698 captured by structural neuroimaging topography. *Nature Neuroscience*, 21(9), 1251–1259.  
699 <https://doi.org/10.1038/s41593-018-0195-0>
- 700 Buxton, R. B., & Frank, L. R. (1997). A Model for the Coupling between Cerebral Blood Flow and

- 701 Oxygen Metabolism during Neural Stimulation. *Journal of Cerebral Blood Flow &*  
702 *Metabolism*, 17(1), 64–72. <https://doi.org/10.1097/00004647-199701000-00009>
- 703 Buxton, R. B., Wong, E. C., & Frank, L. R. (1998). Dynamics of blood flow and oxygenation changes  
704 during brain activation: The balloon model. *Magnetic Resonance in Medicine*, 39(6), 855–  
705 864. <https://doi.org/10.1002/mrm.1910390602>
- 706 Buzsáki, G., & Draguhn, A. (2004). Neuronal Oscillations in Cortical Networks. *Science*, 304(5679),  
707 1926–1929. <https://doi.org/10.1126/science.1099745>
- 708 Cabral, J., Kringelbach, M. L., & Deco, G. (2017). Functional connectivity dynamically evolves on  
709 multiple time-scales over a static structural connectome: Models and mechanisms.  
710 *NeuroImage*, 160, 84–96. <https://doi.org/10.1016/j.neuroimage.2017.03.045>
- 711 Cantero, J. L., Atienza, M., Gomez-Herrero, G., Cruz-Vadell, A., Gil-Neciga, E., Rodriguez-Romero, R.,  
712 & Garcia-Solis, D. (2009). Functional integrity of thalamocortical circuits differentiates  
713 normal aging from mild cognitive impairment. *Human Brain Mapping*, 30(12), 3944–3957.  
714 <https://doi.org/10.1002/hbm.20819>
- 715 Corbetta, M., Patel, G., & Shulman, G. L. (2008). The Reorienting System of the Human Brain: From  
716 Environment to Theory of Mind. *Neuron*, 58(3), 306–324.  
717 <https://doi.org/10.1016/j.neuron.2008.04.017>
- 718 Deco, G., McIntosh, A. R., Shen, K., Hutchison, R. M., Menon, R. S., Everling, S., Hagmann, P., & Jirsa,  
719 V. K. (2014). Identification of Optimal Structural Connectivity Using Functional  
720 Connectivity and Neural Modeling. *Journal of Neuroscience*, 34(23), 7910–7916.  
721 <https://doi.org/10.1523/JNEUROSCI.4423-13.2014>
- 722 Deco, Gustavo, Cruzat, J., Cabral, J., Tagliazucchi, E., Laufs, H., Logothetis, N. K., & Kringelbach, M.

- 723 L. (2019). Awakening: Predicting external stimulation to force transitions between  
724 different brain states. *Proceedings of the National Academy of Sciences*, *116*(36), 18088–  
725 18097. <https://doi.org/10.1073/pnas.1905534116>
- 726 Della Rossa, F., Pecora, L., Blaha, K., Shirin, A., Klickstein, I., & Sorrentino, F. (2020). Symmetries and  
727 cluster synchronization in multilayer networks. *Nature Communications*, *11*(1), 3179.  
728 <https://doi.org/10.1038/s41467-020-16343-0>
- 729 Demirtaş, M., Burt, J. B., Helmer, M., Ji, J. L., Adkinson, B. D., Glasser, M. F., Van Essen, D. C.,  
730 Sotiropoulos, S. N., Anticevic, A., & Murray, J. D. (2018). *Hierarchical Heterogeneity Across*  
731 *Human Cortex Shapes Large-Scale Neural Dynamics* [Preprint]. Neuroscience.  
732 <https://doi.org/10.1101/341966>
- 733 Di Russo, F., Pitzalis, S., Aprile, T., Spitoni, G., Patria, F., Stella, A., Spinelli, D., & Hillyard, S. A. (2007).  
734 Spatiotemporal analysis of the cortical sources of the steady-state visual evoked potential.  
735 *Human Brain Mapping*, *28*(4), 323–334. <https://doi.org/10.1002/hbm.20276>
- 736 Ding, J., Sperling, G., & Srinivasan, R. (2006). Attentional Modulation of SSVEP Power Depends on  
737 the Network Tagged by the Flicker Frequency. *Cerebral Cortex*, *16*(7), 1016–1029.  
738 <https://doi.org/10.1093/cercor/bhj044>
- 739 D’Souza, R. D., & Burkhalter, A. (2017). A Laminar Organization for Selective Cortico-Cortical  
740 Communication. *Frontiers in Neuroanatomy*, *11*, 71.  
741 <https://doi.org/10.3389/fnana.2017.00071>
- 742 Friston, K. J., Harrison, L., & Penny, W. (2003). Dynamic causal modelling. *NeuroImage*, *19*(4), 1273–  
743 1302. [https://doi.org/10.1016/S1053-8119\(03\)00202-7](https://doi.org/10.1016/S1053-8119(03)00202-7)
- 744 Gosak, M., Markovič, R., Dolenšek, J., Slak Rupnik, M., Marhl, M., Stožer, A., & Perc, M. (2018).

- 745 Network science of biological systems at different scales: A review. *Physics of Life Reviews*,
- 746 24, 118–135. <https://doi.org/10.1016/j.plrev.2017.11.003>
- 747 Greig, L. C., Woodworth, M. B., Galazo, M. J., Padmanabhan, H., & Macklis, J. D. (2013). Molecular
- 748 logic of neocortical projection neuron specification, development and diversity. *Nature*
- 749 *Reviews Neuroscience*, 14(11), 755–769. <https://doi.org/10.1038/nrn3586>
- 750 Gulbinaite, R., Roozendaal, D.H.M., VanRullen, R. (2019). Attention differentially modulates the
- 751 amplitude of resonance frequencies in the visual cortex. *NeuroImage*, 203 (2019), 16146.
- 752 <https://doi.org/10.1016/j.neuroimage.2019.116146>
- 753 Guo, D., Perc, M., Liu, T., & Yao, D. (2018). Functional importance of noise in neuronal information
- 754 processing. *EPL (Europhysics Letters)*, 124(5), 50001. [https://doi.org/10.1209/0295-](https://doi.org/10.1209/0295-5075/124/50001)
- 755 [5075/124/50001](https://doi.org/10.1209/0295-5075/124/50001)
- 756 Haegens, S., Cousijn, H., Wallis, G., Harrison, P. J., & Nobre, A. C. (2014). Inter- and intra-individual
- 757 variability in alpha peak frequency. *NeuroImage*, 92, 46–55.
- 758 <https://doi.org/10.1016/j.neuroimage.2014.01.049>
- 759 Hagmann, P., Cammoun, L., Gigandet, X., Meuli, R., Honey, C. J., Wedeen, V. J., & Sporns, O. (2008).
- 760 Mapping the Structural Core of Human Cerebral Cortex. *PLoS Biology*, 6(7), e159.
- 761 <https://doi.org/10.1371/journal.pbio.0060159>
- 762 Herrmann, C. S. (2001). Human EEG responses to 1–100 Hz flicker: resonance phenomena in visual
- 763 cortex and their potential correlation to cognitive phenomena. *Experimental Brain*
- 764 *Research*, 137, 346–353. DOI: 10.1007/s002210100682
- 765
- 766 Herrmann, C. S., Murray, M. M., Ionta, S., Hutt, A., & Lefebvre, J. (2016). Shaping Intrinsic Neural
- 767 Oscillations with Periodic Stimulation. *The Journal of Neuroscience*, 36(19), 5328–5337.

- 768 DOI: 10.1523/JNEUROSCI.0236-16.2016
- 769 Hillyard, S. A., Hinrichs, H., Tempelmann, C., Morgan, S. T., Hansen, J. C., Scheic, H., Heinze, H. J.,  
770 (1997). Combining steady-state visual evoked potentials and fMRI to localize brain activity  
771 during selective attention. *Human Brain Mapping*, 5(4), 287-292.  
772 [https://doi.org/10.1002/\(SICI\)1097-0193\(1997\)5:4<287::AID-HBM14>3.0.CO;2-B](https://doi.org/10.1002/(SICI)1097-0193(1997)5:4<287::AID-HBM14>3.0.CO;2-B)
- 773 Honey, C. J., Kotter, R., Breakspear, M., & Sporns, O. (2007). Network structure of cerebral cortex  
774 shapes functional connectivity on multiple time scales. *Proceedings of the National*  
775 *Academy of Sciences*, 104(24), 10240–10245. <https://doi.org/10.1073/pnas.0701519104>
- 776 Honey, C. J., Sporns, O., Cammoun, L., Gigandet, X., Thiran, J. P., Meuli, R., & Hagmann, P. (2009).  
777 Predicting human resting-state functional connectivity from structural connectivity.  
778 *Proceedings of the National Academy of Sciences*, 106(6), 2035–2040.  
779 <https://doi.org/10.1073/pnas.0811168106>
- 780 Joglekar, M. R., Mejias, J. F., Yang, G. R., & Wang, X.-J. (2018). Inter-areal Balanced Amplification  
781 Enhances Signal Propagation in a Large-Scale Circuit Model of the Primate Cortex. *Neuron*,  
782 98(1), 222–234. <https://doi.org/10.1016/j.neuron.2018.02.031>
- 783 Keitel, C., Quigley, C., & Ruhnau, P. (2014). Stimulus-Driven Brain Oscillations in the Alpha Range:  
784 Entrainment of Intrinsic Rhythms or Frequency-Following Response? *Journal of*  
785 *Neuroscience*, 34(31), 10137–10140. <https://doi.org/10.1523/JNEUROSCI.1904-14.2014>
- 786 Keitel, C., Thut, G., Gross, J. (2017). Visual cortex responses reflect temporal structure of  
787 continuous quasi-rhythmic sensory stimulation. *Neuroimage* 146, 58–70.  
788 <https://doi.org/10.1016/j.neuroimage.2016.11.043>
- 789 Keitel, C., Keitel, A., Benwell, C.S.Y., Daube, C., Thut, G., Gross, J. (2019). Stimulus-driven brain



- 790 rhythms within the alpha band: the attentional-modulation conundrum. *J. Neurosci.* 39,  
791 3119–3129. <https://doi.org/10.1523/JNEUROSCI.1633-18.2019>.
- 792 Koch, S. P., Koendgen, S., Bourayou, R., Steinbrink, J., & Obrig, H. (2008). Individual alpha-frequency  
793 correlates with amplitude of visual evoked potential and hemodynamic response.  
794 *NeuroImage*, 41(2), 233–242. <https://doi.org/10.1016/j.neuroimage.2008.02.018>
- 795 Kramer, A. F., Bherer, L., Colcombe, S. J., Dong, W., & Greenough, W. T. (2004). Environmental  
796 Influences on Cognitive and Brain Plasticity During Aging. *The Journals of Gerontology:*  
797 *Series A*, 59(9), M940–M957. <https://doi.org/10.1093/gerona/59.9.M940>
- 798 Kringelbach, M. L., Cruzat, J., Cabral, J., Knudsen, G. M., Carhart-Harris, R., Whybrow, P. C.,  
799 Logothetis, N. K., & Deco, G. (2020). Dynamic coupling of whole-brain neuronal and  
800 neurotransmitter systems. *Proceedings of the National Academy of Sciences*, 117(17),  
801 9566–9576. <https://doi.org/10.1073/pnas.1921475117>
- 802 Labecki, M., Kus, R., Brzozowska, A., Stacewicz, T., Bhattacharya, B. S., & Suffczynski, P. (2016).  
803 Nonlinear Origin of SSVEP Spectra—A Combined Experimental and Modeling Study.  
804 *Frontiers in Computational Neuroscience*, 10, 1–10.  
805 <https://doi.org/10.3389/fncom.2016.00129>
- 806 Latora, V., & Marchiori, M. (2001). Efficient Behavior of Small-World Networks. *Physical Review*  
807 *Letters*, 87(19), 198701. <https://doi.org/10.1103/PhysRevLett.87.198701>
- 808 Latorre, R., Varona, P., & Rabinovich, M. I. (2019). Rhythmic control of oscillatory sequential  
809 dynamics in heteroclinic motifs. *Neurocomputing*, 331, 108–120.  
810 <https://doi.org/10.1016/j.neucom.2018.11.056>
- 811 Mariotti, L., Losi, G., Sessolo, M., Marcon, I., & Carmignoto, G. (2016). The inhibitory

- 812 neurotransmitter GABA evokes long-lasting Ca<sup>2+</sup> oscillations in cortical astrocytes. *Glia*,  
813 64(3), 363–373. <https://doi.org/10.1002/glia.22933>
- 814 Mejias, J. F., Murray, J. D., Kennedy, H., & Wang, X.-J. (2016). Feedforward and feedback frequency-  
815 dependent interactions in a large-scale laminar network of the primate cortex. *Science*  
816 *Advances*, 2(11), e1601335. <https://doi.org/10.1126/sciadv.1601335>
- 817 Melloni, L., Molina, C., Pena, M., Torres, D., Singer, W., & Rodriguez, E. (2007). Synchronization of  
818 Neural Activity across Cortical Areas Correlates with Conscious Perception. *Journal of*  
819 *Neuroscience*, 27(11), 2858–2865. <https://doi.org/10.1523/JNEUROSCI.4623-06.2007>
- 820 Miller, D. J., Bhaduri, A., Sestan, N., & Kriegstein, A. (2019). Shared and derived features of cellular  
821 diversity in the human cerebral cortex. *Current Opinion in Neurobiology*, 56, 117–124.  
822 <https://doi.org/10.1016/j.conb.2018.12.005>
- 823 Morgan, S. T., Hansen, J. C., & Hillyard, S. A. (1996). Selective attention to stimulus location  
824 modulates the steady-state visual evoked potential. *Proceedings of the National Academy*  
825 *of Sciences*, 93(10), 4770–4774. <https://doi.org/10.1073/pnas.93.10.4770>
- 826 Müller, M. M., Picton, T. W., Valdes-Sosa, P., Riera, J., Teder-Sälejärvi, W. A., & Hillyard, S. A. (1998).  
827 Effects of spatial selective attention on the steady-state visual evoked potential in the 20-  
828 28 Hz range. *Cognitive Brain Research*, 6(4), 249–261. DOI: 10.1016/s0926-  
829 6410(97)00036-0
- 830 Müller, M. M. & Hillyard, S. A. (2000). Concurrent recording of steady-state and transient event-  
831 related potentials as indices of visual-spatial selective attention. *Clinical Neurophysiology*,  
832 111, 1544-1552. DOI: 10.1016/s1388-2457(00)00371-0
- 833 Muthukumaraswamy, S. D., Edden, R. A. E., Jones, D. K., Swettenham, J. B., & Singh, K. D. (2009).

- 834 Resting GABA concentration predicts peak gamma frequency and fMRI amplitude in  
835 response to visual stimulation in humans. *Proceedings of the National Academy of*  
836 *Sciences*, 106(20), 8356–8361. <https://doi.org/10.1073/pnas.0900728106>
- 837 Newman, M. E. J. (2003). The Structure and Function of Complex Networks. *SIAM Review*, 45(2),  
838 167–256. <https://doi.org/10.1137/S003614450342480>
- 839 Norcia, A. M., Appelbaum, L. G., Ales, J. M., Cottareau, B. R., & Rossion, B. (2015). The steady-state  
840 visual evoked potential in vision research: A review. *Journal of Vision*, 15(6), 1–46.  
841 <https://doi.org/10.1167/15.6.4>
- 842 Notbohm, A., Kurths, J., & Herrmann, C. S. (2016) Modification of brain oscillations via rhythmic  
843 light stimulation provides evidence for entrainment but not for superposition of event-  
844 related responses. *Front Human Neuroscience*, 10:10. [https://doi.org/10.3389/fnhum.](https://doi.org/10.3389/fnhum.2016.00010)  
845 2016.00010
- 846 Nunez, P. L., Srinivasan, R., Westdorp, A. F., Wijesinghe, R. S., Tucker, D. M., Silberstein, R. B., &  
847 Cadusch, P. J. (1997). EEG coherency I: statistics, reference electrode, volume conduction,  
848 Laplacians, cortical imaging, and interpretation at multiple scales. *Electroencephalography*  
849 *and Clinical Neurophysiology*, 103(1997), 499–515. [https://doi.org/10.1016/S0013-](https://doi.org/10.1016/S0013-4694(97)00066-7)  
850 4694(97)00066-7
- 851 Parastesh, F., Jafari, S., Azarnoush, H., Shahriari, Z., Wang, Z., Boccaletti, S., & Perc, M. (2021).  
852 Chimeras. *Physics Reports*, 898, 1–114. <https://doi.org/10.1016/j.physrep.2020.10.003>
- 853 Pastor, M. A., Artieda, J., Arbizu, J., Valencia, M., & Masdeu, J. C. (2003). Human Cerebral Activation  
854 during Steady-State Visual-Evoked Responses. *The Journal of Neuroscience*, 23(37),  
855 11621–11627. <https://doi.org/10.1523/JNEUROSCI.23-37-11621.2003>

- 856 Pfurtscheller, G. (2003). Induced Oscillations in the Alpha Band: Functional Meaning. *Epilepsia*,  
857 44(s12), 2–8. <https://doi.org/10.1111/j.0013-9580.2003.12001.x>
- 858 Ponce-Alvarez, A., He, B. J., Hagmann, P., & Deco, G. (2015). Task-Driven Activity Reduces the  
859 Cortical Activity Space of the Brain: Experiment and Whole-Brain Modeling. *PLOS*  
860 *Computational Biology*, 11(8), e1004445. <https://doi.org/10.1371/journal.pcbi.1004445>
- 861 Rager, G., & Singer, W. (1998). The response of cat visual cortex to flicker stimuli of variable  
862 frequency: The response of cat visual cortex to flicker stimuli. *European Journal of*  
863 *Neuroscience*, 10(5), 1856–1877. <https://doi.org/10.1046/j.1460-9568.1998.00197.x>
- 864 Roberts, J. A., & Robinson, P. A. (2012). Quantitative theory of driven nonlinear brain dynamics.  
865 *NeuroImage*, 62(3), 1947–1955. <https://doi.org/10.1016/j.neuroimage.2012.05.054>
- 866 Schirner, M., McIntosh, A. R., Jirsa, V., Deco, G., & Ritter, P. (2018). Inferring multi-scale neural  
867 mechanisms with brain network modelling. *ELife*, 7, e28927.  
868 <https://doi.org/10.7554/eLife.28927.001>
- 869 Shine, J. M., Aburn, M. J., Breakspear, M., & Poldrack, R. A. (2018). The modulation of neural gain  
870 facilitates a transition between functional segregation and integration in the brain. *ELife*,  
871 7, e31130. <https://doi.org/10.7554/eLife.31130>
- 872 Spaak, E., Lange, F. P. de, & Jensen, O. (2014). Local Entrainment of Alpha Oscillations by Visual  
873 Stimuli Causes Cyclic Modulation of Perception. *Journal of Neuroscience*, 34(10), 3536–  
874 3544. <https://doi.org/10.1523/JNEUROSCI.4385-13.2014>
- 875 Srinivasan, R., Bibi, F. A., & Nunez, P. L. (2006). Steady-State Visual Evoked Potentials: Distributed  
876 Local Sources and Wave-Like Dynamics Are Sensitive to Flicker Frequency. *Brain*  
877 *Topography*, 18(3), 167–187. <https://doi.org/10.1007/s10548-006-0267-4>

- 878 Srinivasan, R., Fornari, E., Knyazeva, M. G., Meuli, R., & Maeder, P. (2007). FMRI responses in medial  
879 frontal cortex that depend on the temporal frequency of visual input. *Experimental Brain*  
880 *Research*, 180(4), 677–691. <https://doi.org/10.1007/s00221-007-0886-3>
- 881 Thut, G., Miniussi, C., & Gross, J. (2012). The Functional Importance of Rhythmic Activity in the  
882 Brain. *Current Biology*, 22(16), R658–R663. <https://doi.org/10.1016/j.cub.2012.06.061>
- 883 Vialatte, F.-B., Maurice, M., Dauwels, J., & Cichocki, A. (2010). Steady-state visually evoked  
884 potentials: Focus on essential paradigms and future perspectives. *Progress in*  
885 *Neurobiology*, 90(4), 418–438. <https://doi.org/10.1016/j.pneurobio.2009.11.005>
- 886 Watts, D., & Strogatz, S. (1998). Collective Dynamics of Small-World Networks. *Nature*, 393, 440–  
887 442. <https://doi.org/10.1038/30918>
- 888 Xu, P., Tian, C., Zhang, Y., Jing, W., Wang, Z., Liu, T., Hu, J., Tian, Y., Xia, Y., & Yao, D. (2013). Cortical  
889 network properties revealed by SSVEP in anesthetized rats. *Scientific Reports*, 3(1), 2496.  
890 <https://doi.org/10.1038/srep02496>
- 891 Yang, Z., Guo, D., Zhang, Y., Wu, S., & Yao, D. (2019). Visual Evoked Response Modulation Occurs in  
892 a Complementary Manner Under Dynamic Circuit Framework. *IEEE Transactions on Neural*  
893 *Systems and Rehabilitation Engineering*, 27(10), 2005–2014.  
894 <https://doi.org/10.1109/TNSRE.2019.2940712>
- 895 Zhang, Y., Xu, P., Guo, D., & Yao, D. (2013). Prediction of SSVEP-based BCI performance by the  
896 resting-state EEG network. *Journal of Neural Engineering*, 10(6), 066017.  
897 <https://doi.org/10.1088/1741-2560/10/6/066017>
- 898 Zhang, Y., Zhou, G., Jin, J., Wang, X., & Cichocki, A. (2013). Frequency recognition in ssvep-based  
899 bci using multiset canonical correlation analysis. *International Journal of Neural Systems*,

900           24(04), 1450013. <https://doi.org/10.1142/S0129065714500130>

901   Zhang, Y., Zhou, G., Jin, J., Wang, X., & Cichocki, A. (2015). SSVEP recognition using common feature

902           analysis in brain–computer interface. *Journal of Neuroscience Methods*, 244, 8–15.

903           <https://doi.org/10.1016/j.jneumeth.2014.03.012>

904   Ziaemehr, A., Zarei, M., Valizadeh, A., & Mirasso, C. R. (2020). Frequency-dependent organization

905           of the brain’s functional network through delayed-interactions. *Neural Networks*, 132,

906           155–165. <https://doi.org/10.1016/j.neunet.2020.08.003>

907

908

909

910 **Figures**

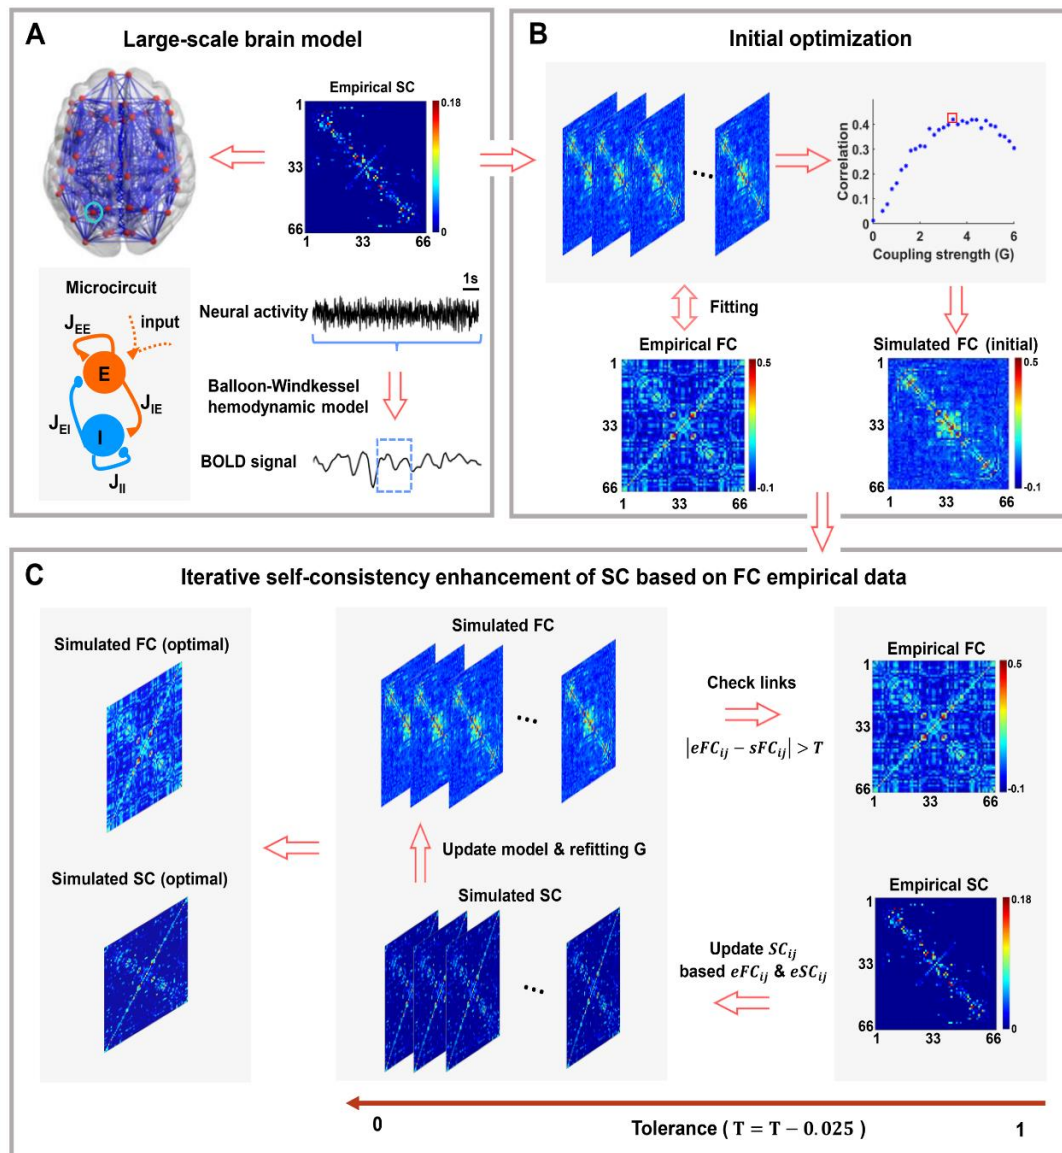

911

912 **Figure 1.** Overview of the large-scale brain model. **A:** In the large-scale brain model, each brain  
 913 region is modeled as a microcircuit that is composed of coupled excitatory (E) and inhibitory  
 914 (I) neural populations. The empirical SC is used to define initial connectivity among different  
 915 brain regions. The excitatory neural activity can be converted into the simulated BOLD signal  
 916 with the Balloon-Windkessel hemodynamic model. As an example, the blue dotted square  
 917 represents the BOLD signal transformed from the above neural activity. **B:** Initial optimization  
 918 for the large-scale brain model. After fitting, an initial simulated FC is obtained at an optimal  
 919 global coupling factor  $G$  (red square) under the constraints of empirical SC and FC. **C:**  
 920 Schematic presentation of iterative self-consistency enhancement of SC based on empirical FC.  
 921 This strategy begins with an initial tolerance of 1 and stops when the tolerance level is close to  
 922 0. A detailed description of this optimization strategy can be found in the Model and Methods  
 923 section. With the iterative-fitting strategy, we obtained both the optimal simulated SC and FC  
 924 used in this study.

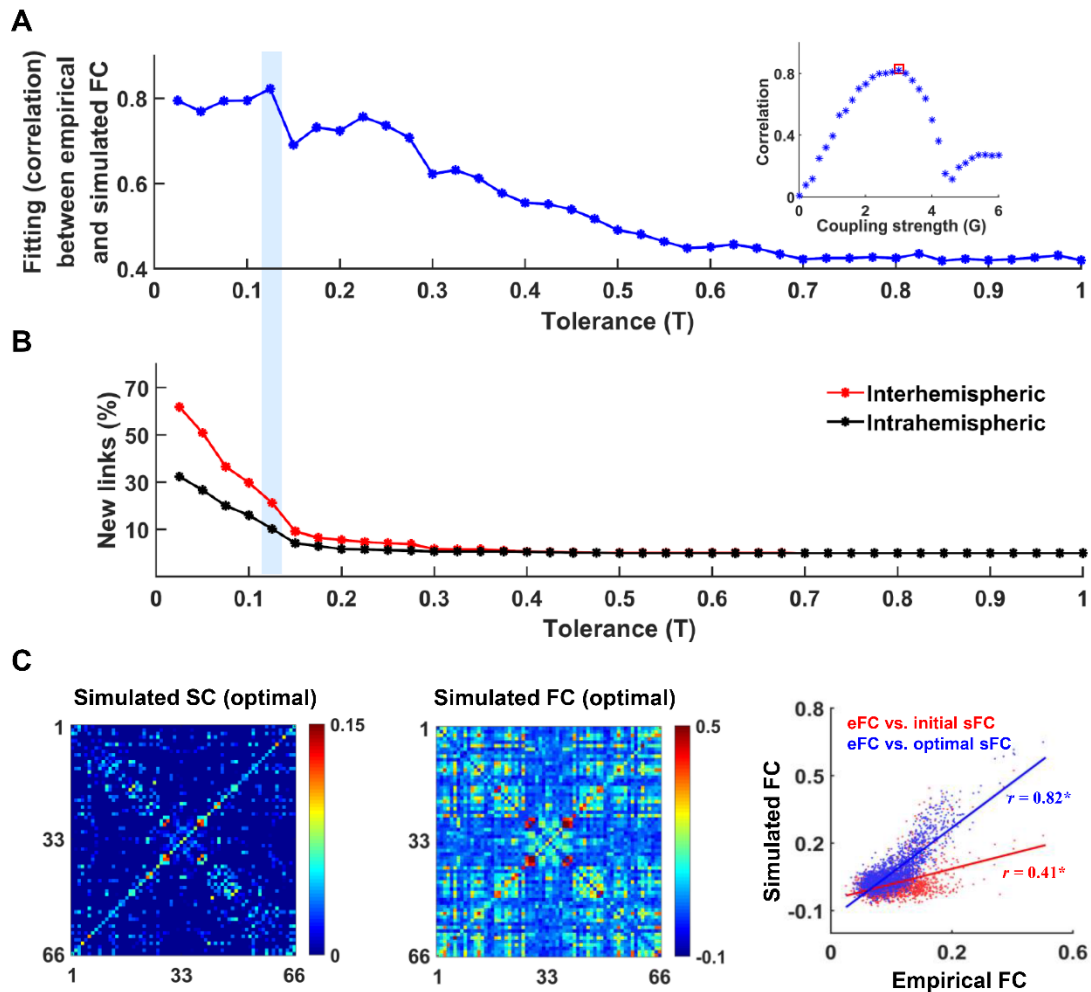

925

926 **Figure 2.** Model optimization based on the iterative-fitting strategy. **A:** The fitting between  
 927 empirical and simulated FC with decreasing tolerance  $T$ . The optimal simulated FC is obtained  
 928 at an optimal global coupling factor  $G$  (red square) under the constraints of the new simulated  
 929 SC (updated SC at tolerance  $T = 0.125$ ). **B:** The cumulative percentage of new  
 930 intrahemispheric (black) and interhemispheric (red) links added to simulated SC with  
 931 decreasing tolerance. **C:** The optimal simulated SC (left panel) and FC (middle panel) matrices  
 932 are obtained at a relatively low level of tolerance ( $T = 0.125$ ) and an optimal global-scale  
 933 coupling factor ( $G = 3.01$ ). The right panel shows correlations between empirical and  
 934 simulated FC before and after the iterative-fitting strategy. The red line indicates the correlation  
 935 between empirical FC and initial simulated FC ( $r = 0.41$ ), and the blue line shows the  
 936 correlation between empirical FC and optimal simulated FC obtained by using an iterative-  
 937 fitting strategy ( $r = 0.82$ ).  $r$  denotes the correlation coefficient, and the symbol  $*$  means  
 938 significant at the 99% level ( $p < 0.01$ ). Statistical significance was determined by the two-  
 939 tailed Student's t-test.



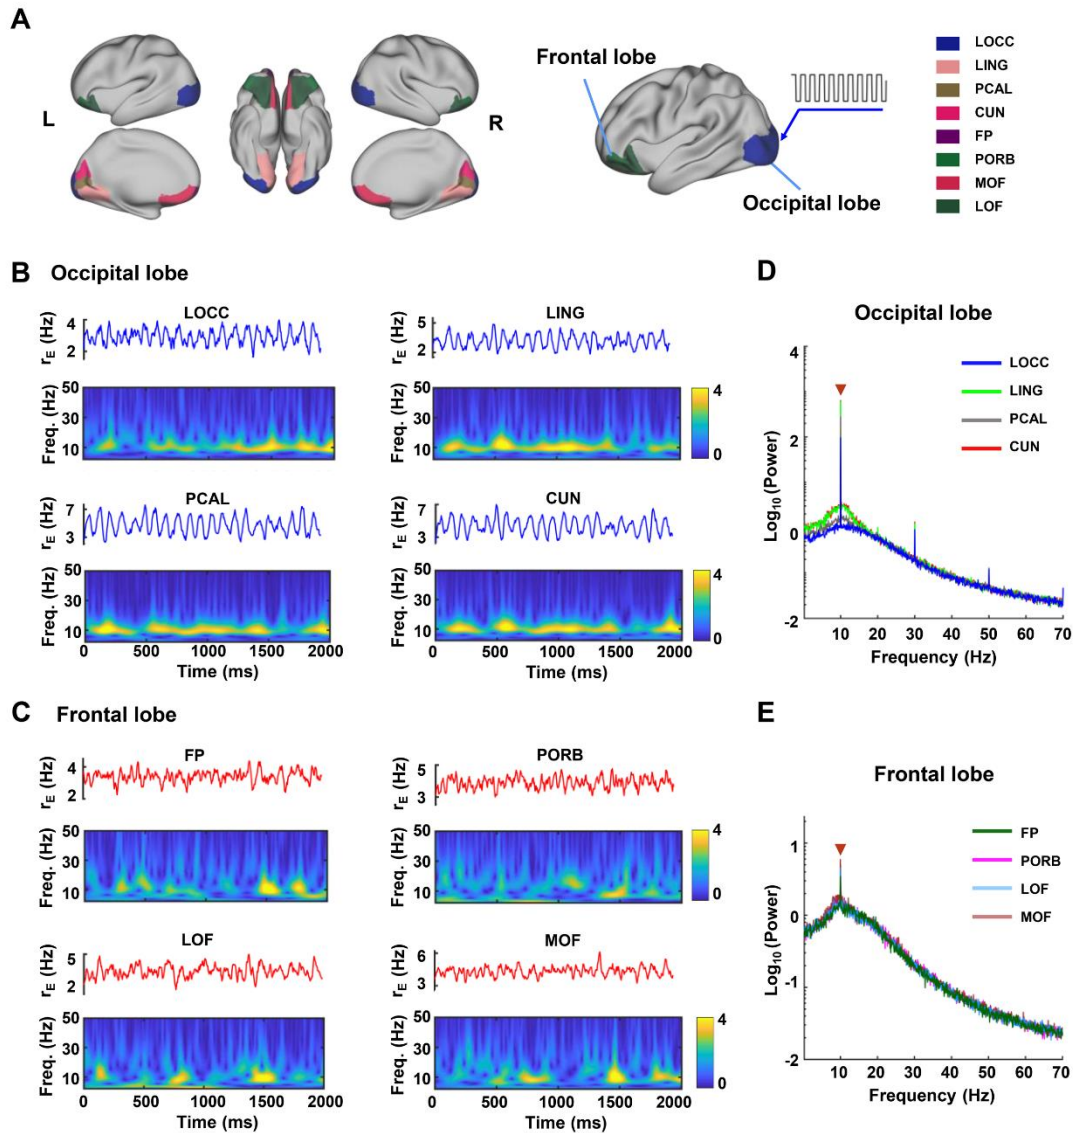

940

941 **Figure 3.** SSVEP responses at different occipital and frontal regions. **A:** Schematic diagram of  
 942 the occipital-related regions (LOCC, LING, PCAL and CUN) and frontal-related regions (FP,  
 943 PORB, LOF and MOF) evaluated in this study. To simulate flickering visual stimulation, these  
 944 occipital regions were assumed to be driven by a square wave with an amplitude of 0.5 nA and  
 945 a frequency of 10 Hz. **B, C:** Examples of typical neural activity and the corresponding time-  
 946 frequency spectrogram for brain regions distributed in the occipital (B) and frontal lobes (C).  
 947 **D, E:** The average power spectrum of neural activity for regions in the occipital (D) and frontal  
 948 (E) lobes. The red triangle denotes the SSVEP peaks occurring at a stimulus frequency of 10  
 949 Hz. The large-scale brain model can reproduce the fundamental dynamic features of SSVEP  
 950 responses.

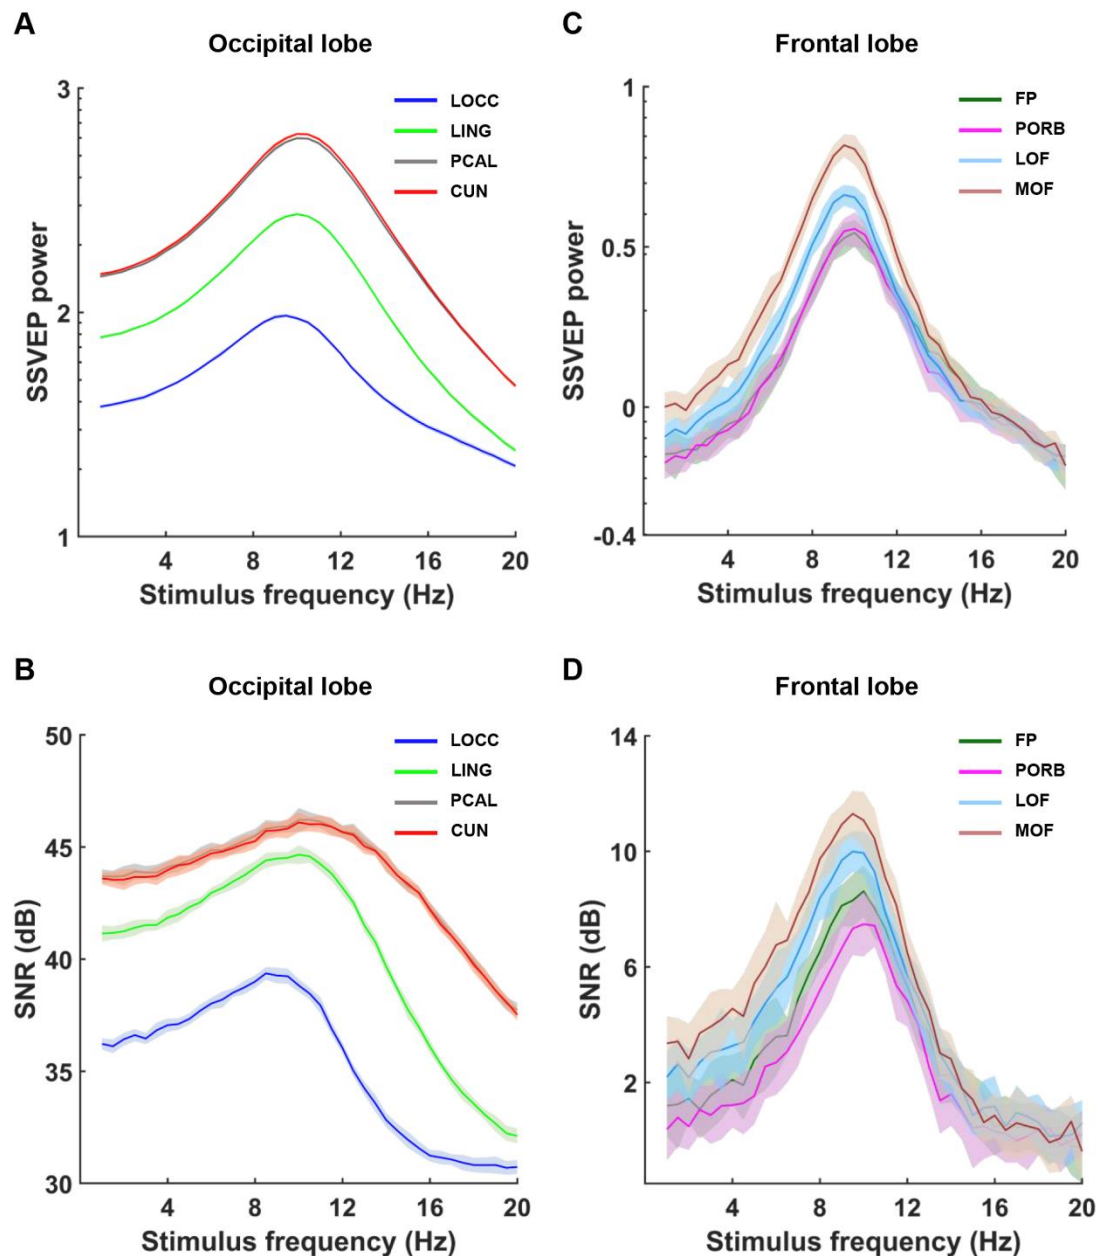

951

952 **Figure 4.** Dependence of SSVEP responses on stimulus frequency. **A, B:** SSVEP power (A)  
953 and the SNR value (B) for different occipital regions at different stimulus frequencies. **C, D:**  
954 SSVEP power (C) and the SNR value (D) for different frontal regions at different stimulus  
955 frequencies. All data are plotted as the mean (curve)  $\pm$  SD (standard deviation; shaded region).  
956 A typical frequency-sensitivity range of 8-12 Hz is present in each region. The occipital and  
957 frontal regions showed optimal responses to external periodic visual stimuli in the alpha  
958 frequency band (8-12 Hz).

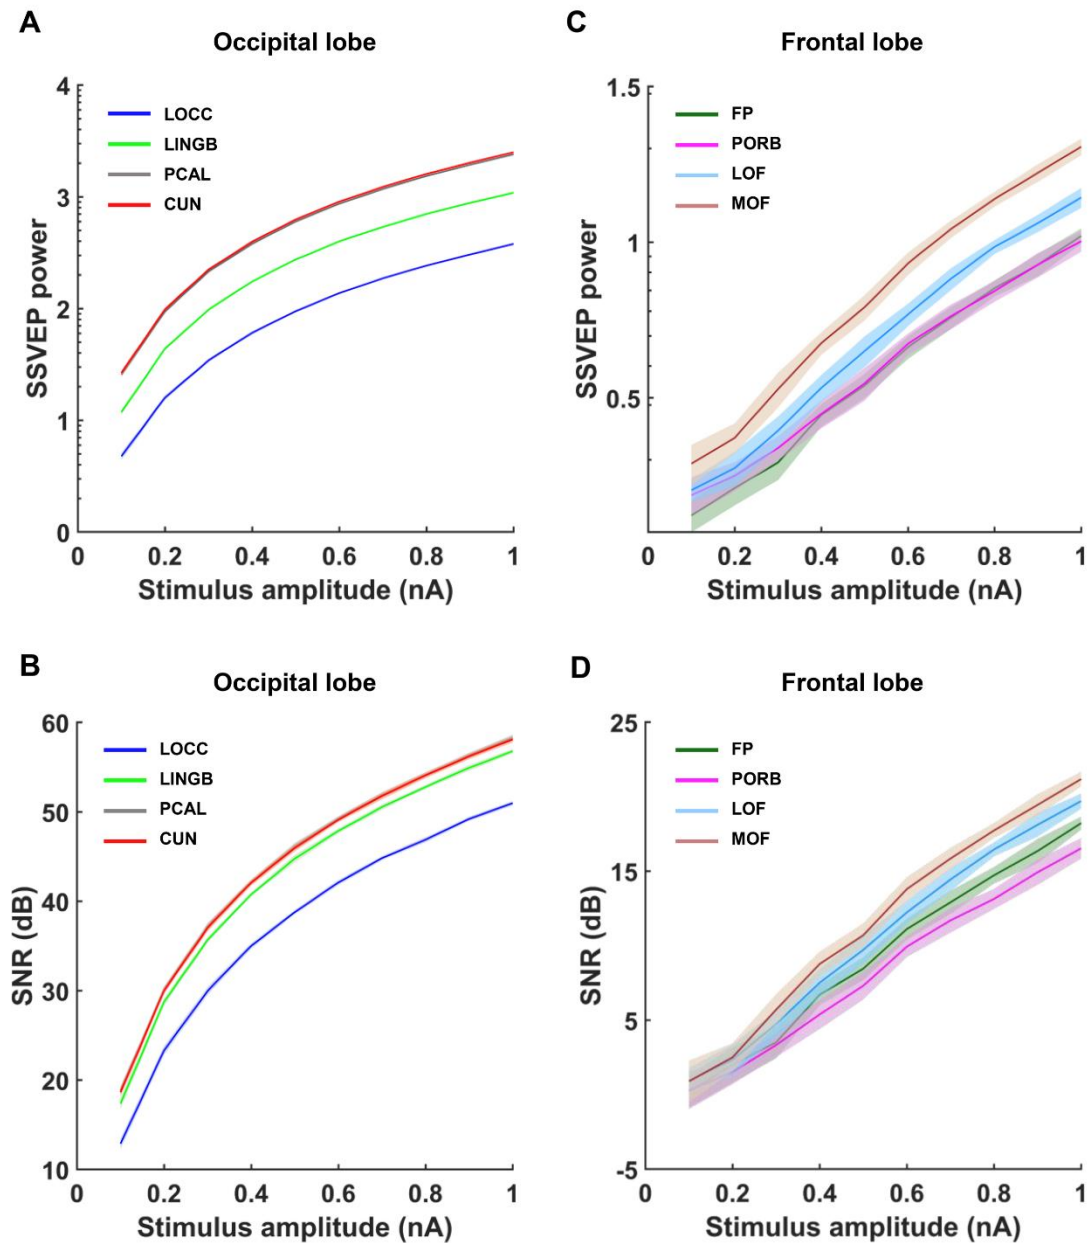

959

960 **Figure 5.** The performance of SSVEP responses is influenced by the stimulus amplitude. **A, B:**  
961 SSVEP power (A) and the SNR value (B) for different occipital regions at different stimulus  
962 amplitudes. **C, D:** SSVEP power (C) and the SNR value (D) for different frontal regions at  
963 different stimulus amplitudes. All data are plotted as the mean (curve)  $\pm$  SD (shaded region).  
964 The positive relationships between SSVEP responses and stimulus amplitude can be observed  
965 in both the occipital and frontal regions.

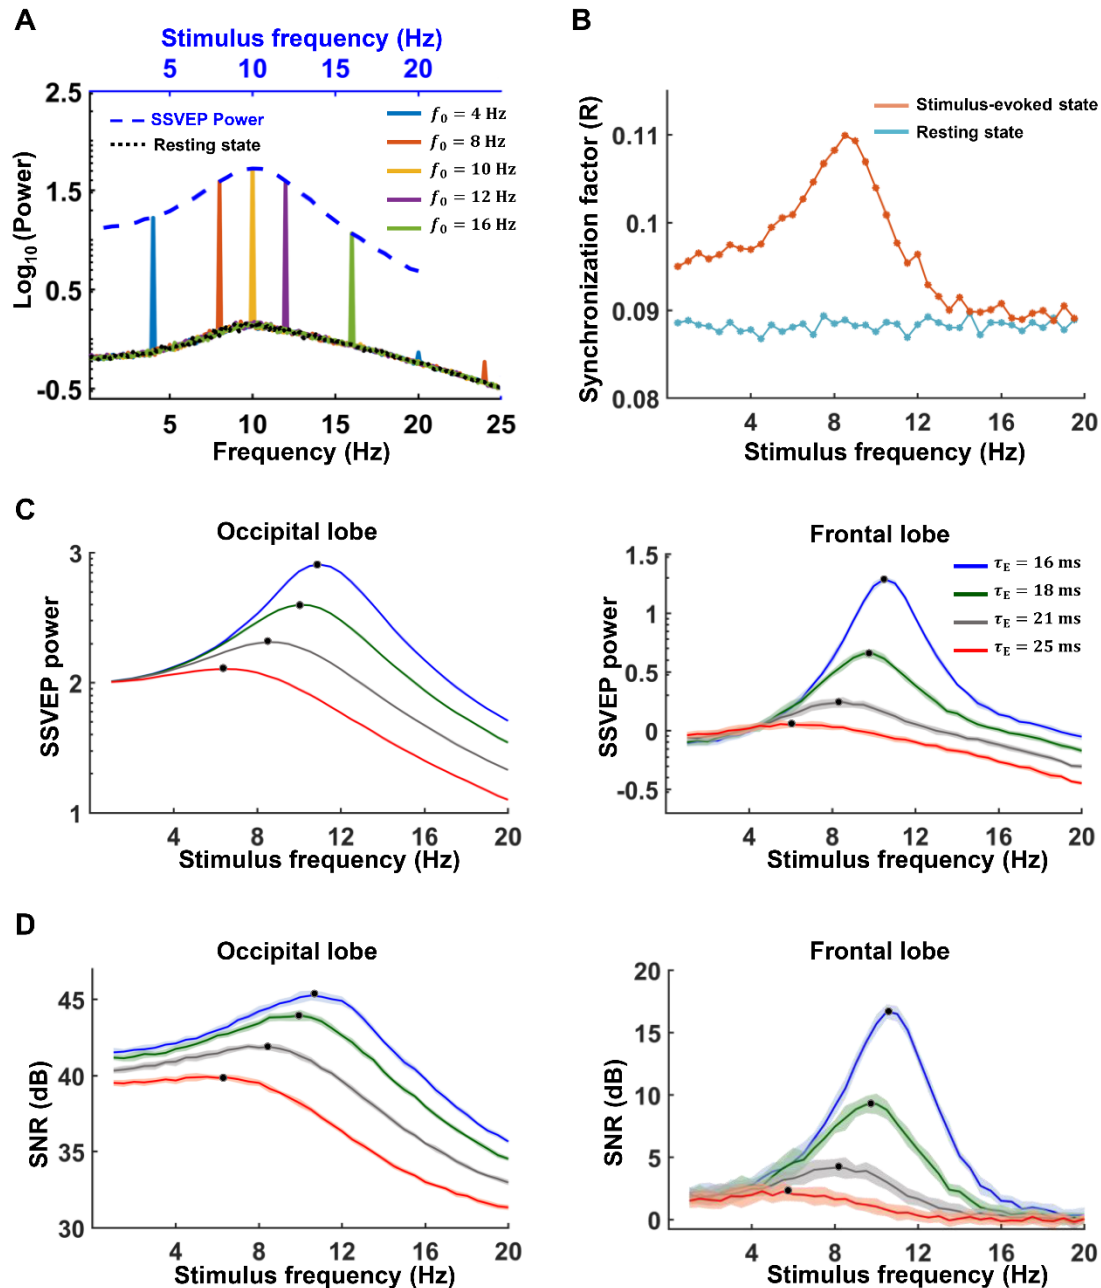

966

967 **Figure 6.** Dynamical nature of the frequency sensitivity of SSVEPs. **A:** The average power  
 968 spectrum density across all brain regions in the resting state (black dotted line) and in different  
 969 stimulus-evoked states (colored lines). The blue, orange, yellow, purple, and green lines  
 970 represent the average power spectrum at stimulus frequencies of 4 Hz, 8 Hz, 10 Hz, 14 Hz, and  
 971 16 Hz, respectively. For comparison, we also plotted the SSVEP power (blue dotted line) as a  
 972 function of stimulus frequency in the same figure. **B:** The synchronization factor  $R$  for brain  
 973 networks at both the resting and stimulus-evoked states under different frequencies. **C:** The  
 974 average SSVEP power (C) and the average SNR (D) for the occipital (left) and frontal (right)  
 975 lobes at different stimulus frequencies. Here, different colors in C and D represent different  
 976 time constants of excitatory neural populations, and black dots indicate curve peaks.

977

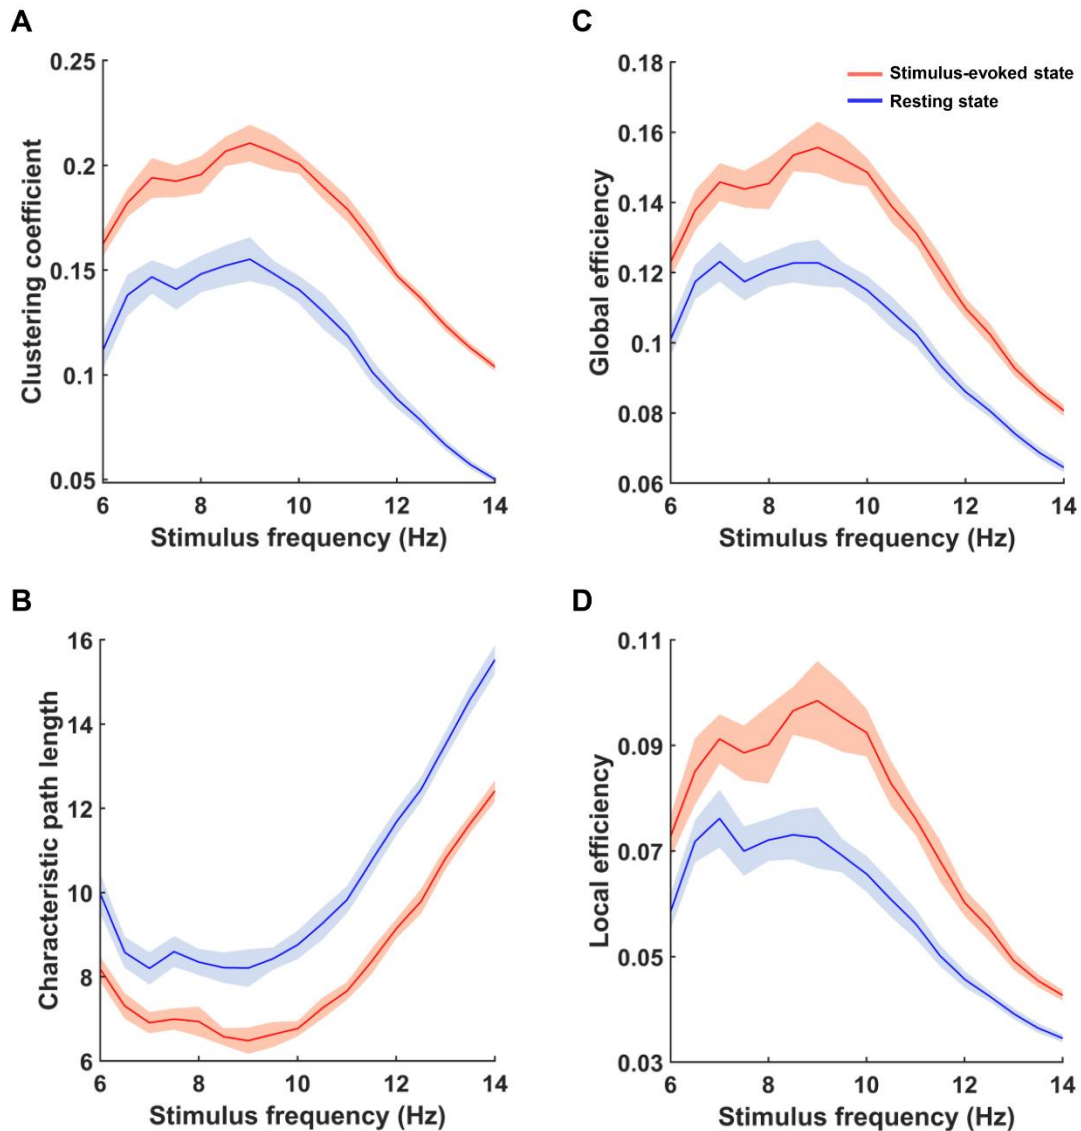

978

979 **Figure 7.** Network properties of the stimulus-evoked and resting brain states at different  
980 frequency points. **A-D:** Clustering coefficient (A), characteristic path length (B), global  
981 efficiency (C), and local efficiency (D). Red lines indicate the stimulus-evoked network  
982 properties at the stimulus frequency point, and blue lines represent resting-state network  
983 properties at the corresponding frequency point. All data are plotted as the mean (curve)  $\pm$  SD  
984 (shaded region). The stimulus-evoked brain networks displayed stronger clustering coefficients,  
985 global efficiency, and local efficiency and smaller characteristic path lengths than those of the  
986 resting-state brain networks.

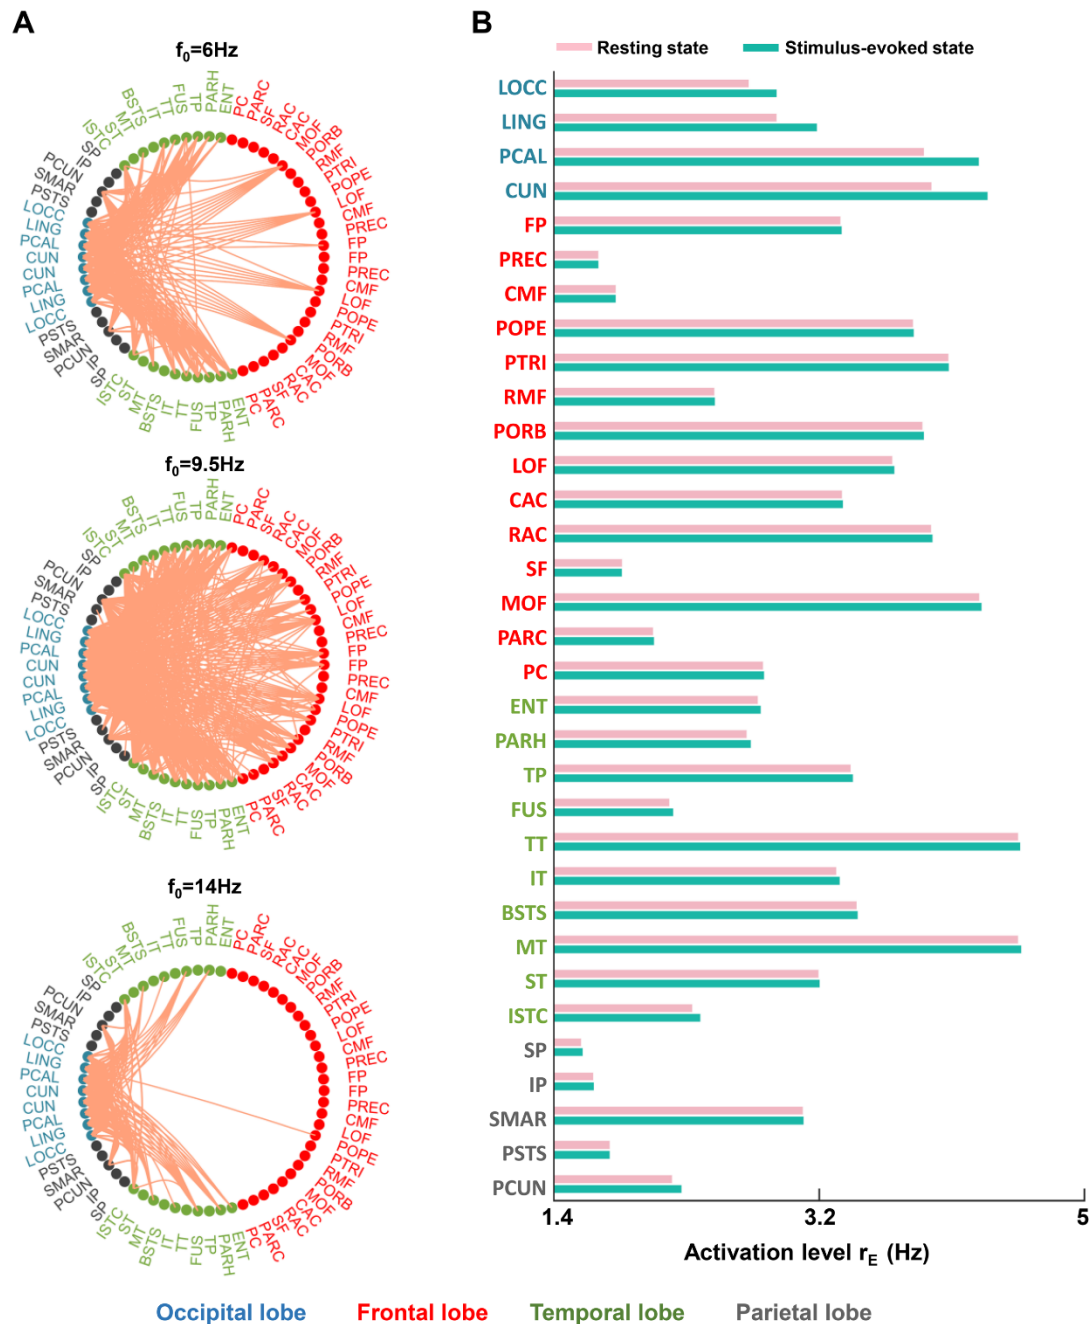

987

988 **Figure 8.** Alterations in connectivity and activation level between the stimulus-evoked and  
 989 resting brain states. **A:** Significant changes in FC at the neural activity level for different  
 990 stimulus frequencies (from top to bottom:  $f_0 = 6$  Hz, 9.5 Hz, and 14 Hz). The results were  
 991 statistically compared by a two-sample student's t-test with a significance level of  $p < 0.05$   
 992 (familywise error (FWE) correction). Orange lines indicate enhanced connections at the  
 993 stimulus-evoked state, and no significantly decreased connectivity was identified after FWE  
 994 correction. **B:** Comparison of the average activation level for each brain region between the  
 995 resting state and stimulus-evoked state ( $f_0 = 9.5$  Hz). Under the appropriate stimulus frequency  
 996 of 9.5 Hz, the connectivity within the whole brain was enhanced and the average activation  
 997 levels only for regions in the occipital lobe are observed.

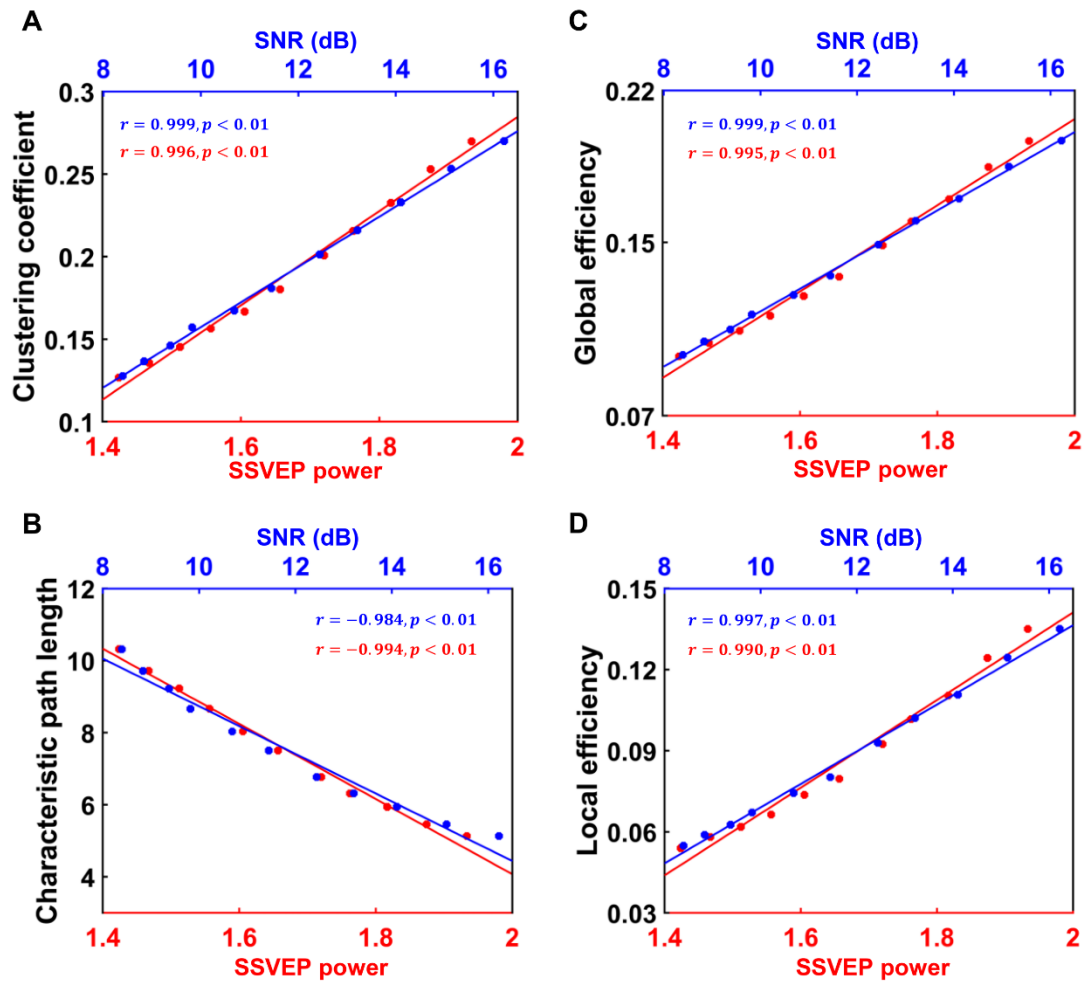

998

999 **Figure 9.** The correlation between SSVEP responses and stimulus-evoked network properties  
1000 for global-scale couplings near its optimal point of  $G = 3.01$ . In simulations, the global-scale  
1001 coupling  $G$  gradually changed from 2.7 to 3.2, with a fixed step of 0.05. **A-D:** Clustering  
1002 coefficient (A), characteristic path length (B), global efficiency (C), and local efficiency (D).  
1003 Blue and red lines represent the SNR value and SSVEP power, respectively. Here,  $r$  denotes  
1004 the correlation coefficient, and  $p$  means the significance level of the correlation coefficient.  
1005 Statistical significance was determined by the two-tailed Student's t-test. The clustering  
1006 coefficient, global efficiency, and local efficiency showed significantly positive correlations  
1007 with both SSVEP power and SNR values, whereas the SSVEP responses were negatively  
1008 correlated with the characteristic path length of brain networks.

1009

1010

1011

1012

1013

1014

1015 **Tables**

1016 **Table 1.** Names and abbreviations for the 66 cortical regions used in the present study. Two  
1017 labels (i.e., R and L) refer to the right and left hemispheres, respectively.

| <b>Region name</b>                   | <b>Abbreviation</b> | <b>Label (R)</b> | <b>Label (L)</b> |
|--------------------------------------|---------------------|------------------|------------------|
| Bank of the superior temporal sulcus | BSTS                | 12               | 55               |
| Caudal anterior cingulate cortex     | CAC                 | 23               | 44               |
| Caudal middle frontal cortex         | CMF                 | 17               | 50               |
| Cuneus                               | CUN                 | 29               | 38               |
| Entorhinal cortex                    | ENT                 | 1                | 66               |
| Frontal pole                         | FP                  | 4                | 63               |
| Fusiform gyrus                       | FUS                 | 5                | 62               |
| Inferior parietal cortex             | IP                  | 10               | 57               |
| Inferior temporal cortex             | IT                  | 9                | 58               |
| Isthmus of the cingulate cortex      | ISTC                | 31               | 36               |
| Lateral occipital cortex             | LOCC                | 7                | 60               |
| Lateral orbitofrontal cortex         | LOF                 | 22               | 45               |
| Lingual gyrus                        | LING                | 27               | 40               |
| Medial orbitofrontal cortex          | MOF                 | 26               | 41               |
| Middle temporal cortex               | MT                  | 13               | 54               |
| Paracentral lobule                   | PARC                | 30               | 37               |
| Parahippocampal cortex               | PARH                | 2                | 65               |
| Pars opercularis                     | POPE                | 18               | 49               |
| Pars orbitalis                       | PORB                | 21               | 46               |
| Pars triangularis                    | PTRI                | 19               | 48               |
| Pericalcarine cortex                 | PCAL                | 28               | 37               |
| Postcentral gyrus                    | PSTS                | 15               | 52               |
| Posterior cingulate cortex           | PC                  | 33               | 34               |
| Precentral gyrus                     | PREC                | 16               | 51               |
| Precuneus                            | PCUN                | 32               | 35               |
| Rostral anterior cingulate cortex    | RAC                 | 24               | 43               |
| Rostral middle frontal cortex        | RMF                 | 20               | 47               |
| Superior frontal cortex              | SF                  | 25               | 42               |
| Superior parietal cortex             | SP                  | 8                | 59               |
| Superior temporal cortex             | ST                  | 14               | 53               |
| Supramarginal gyrus                  | SMAR                | 11               | 56               |
| Temporal pole                        | TP                  | 3                | 64               |
| Transverse temporal cortex           | TT                  | 6                | 61               |

1018

1019



1020 **Table 2.** The default values of the model parameters used in the simulations.

| Parameters   | Description                                     | Values |
|--------------|-------------------------------------------------|--------|
| $\tau_E^j$   | Excitatory synaptic time constants              | 18 ms  |
| $\tau_I^j$   | Inhibitory synaptic time constants              | 25 ms  |
| $I_b^j$      | Background current                              | 2      |
| $A$          | Amplitude of the stimulus signal                | 0.5    |
| $\sigma_E^j$ | Noise strength of the excitatory population     | 0.45   |
| $\sigma_I^j$ | Noise strength of the inhibitory population     | 0.45   |
| $J_{EE}$     | Synaptic strength of E $\rightarrow$ E coupling | 1.5    |
| $J_{EI}$     | Synaptic strength of I $\rightarrow$ E coupling | -2.6   |
| $J_{IE}$     | Synaptic strength of E $\rightarrow$ I coupling | 3.5    |
| $J_{II}$     | Synaptic strength of I $\rightarrow$ I coupling | -2.5   |

1021

1022

1023

1024

1025
